# Supplementary material
Source: PubMed Central journal article supplement (PMC7837128)
Supplement: mmc1.pdf [file mmc1.pdf]

## Supplemental Information

### The immunodominant and neutralization

### linear epitopes for SARS-CoV-2

Shuai Lu, Xi-xiu Xie, Lei Zhao, Bin Wang, Jie Zhu, Ting-rui Yang, Guang-wen Yang, Mei Ji, Cui-ping Lv, Jian Xue, Er-wei Dai, Xi-ming Fu, Dong-qun Liu, Lun Zhang, Sheng-jie Hou, Xiao-lin Yu, Yu-ling Wang, Hui-xia Gao, Xue-han Shi, Chang-wen Ke, Bi-xia Ke, Chun-guo Jiang, and Rui-tian Liu

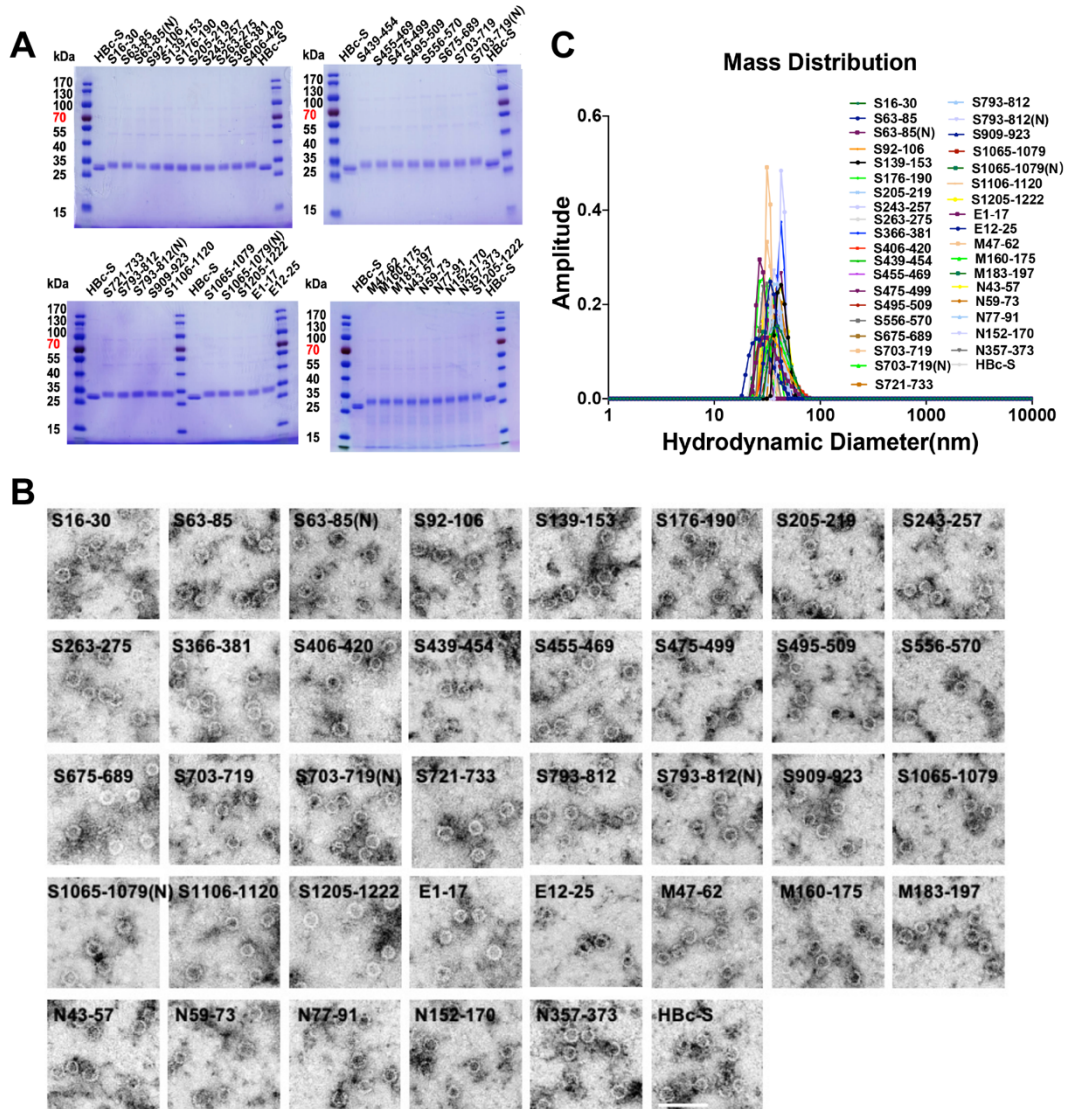

**Figure S1. Preparation of HBC-S VLPs displayed with the epitopes.** Related to Figure 1. (A) SDS-PAGE analysis of the conjugation of HBC-S with epitope peptides. (B) The morphology of HBC-S-P VLPs. HBC-S-P VLPs were imaged by Hitachi TEM at 80 KV at 40,000 $\times$  magnification, the scale bar is 200 nm. (C) The representative hydrodynamic diameter of HBC-S-P VLPs.

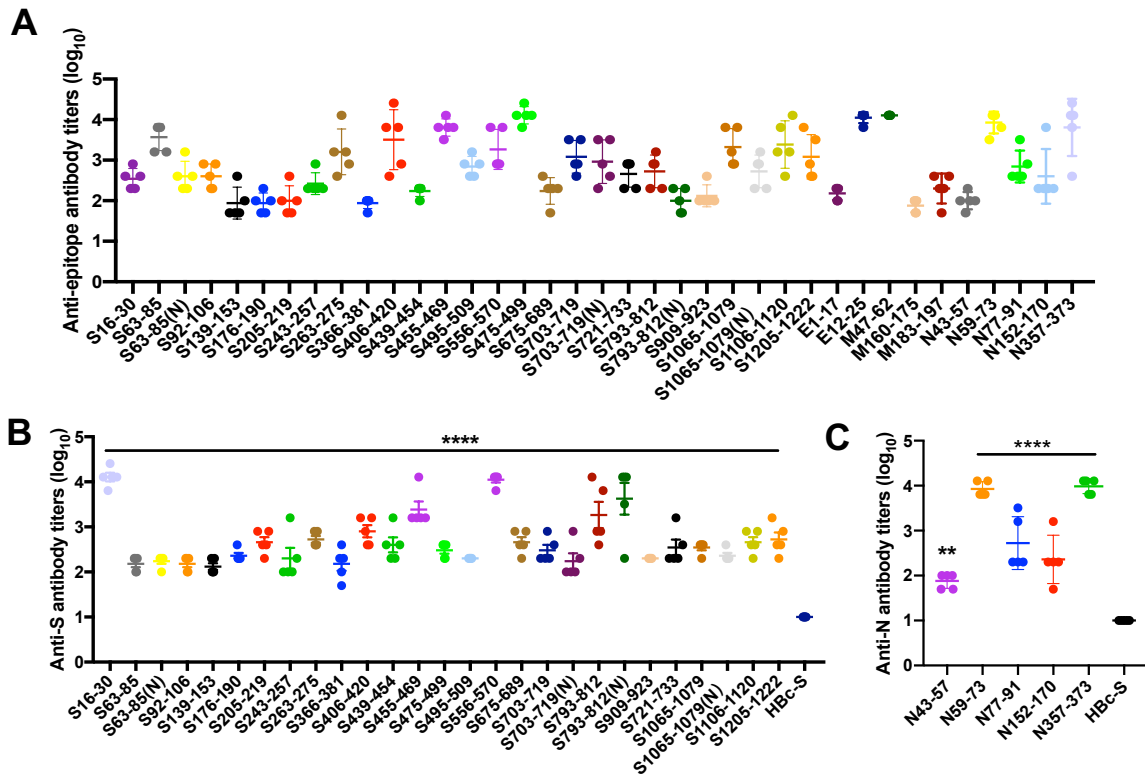

**Figure S2. Epitope conjugated on HBC-S VLPs induced high antibody titers against epitope peptides and S, N proteins at 10 days after the second immunization. Related to Figure 1.**

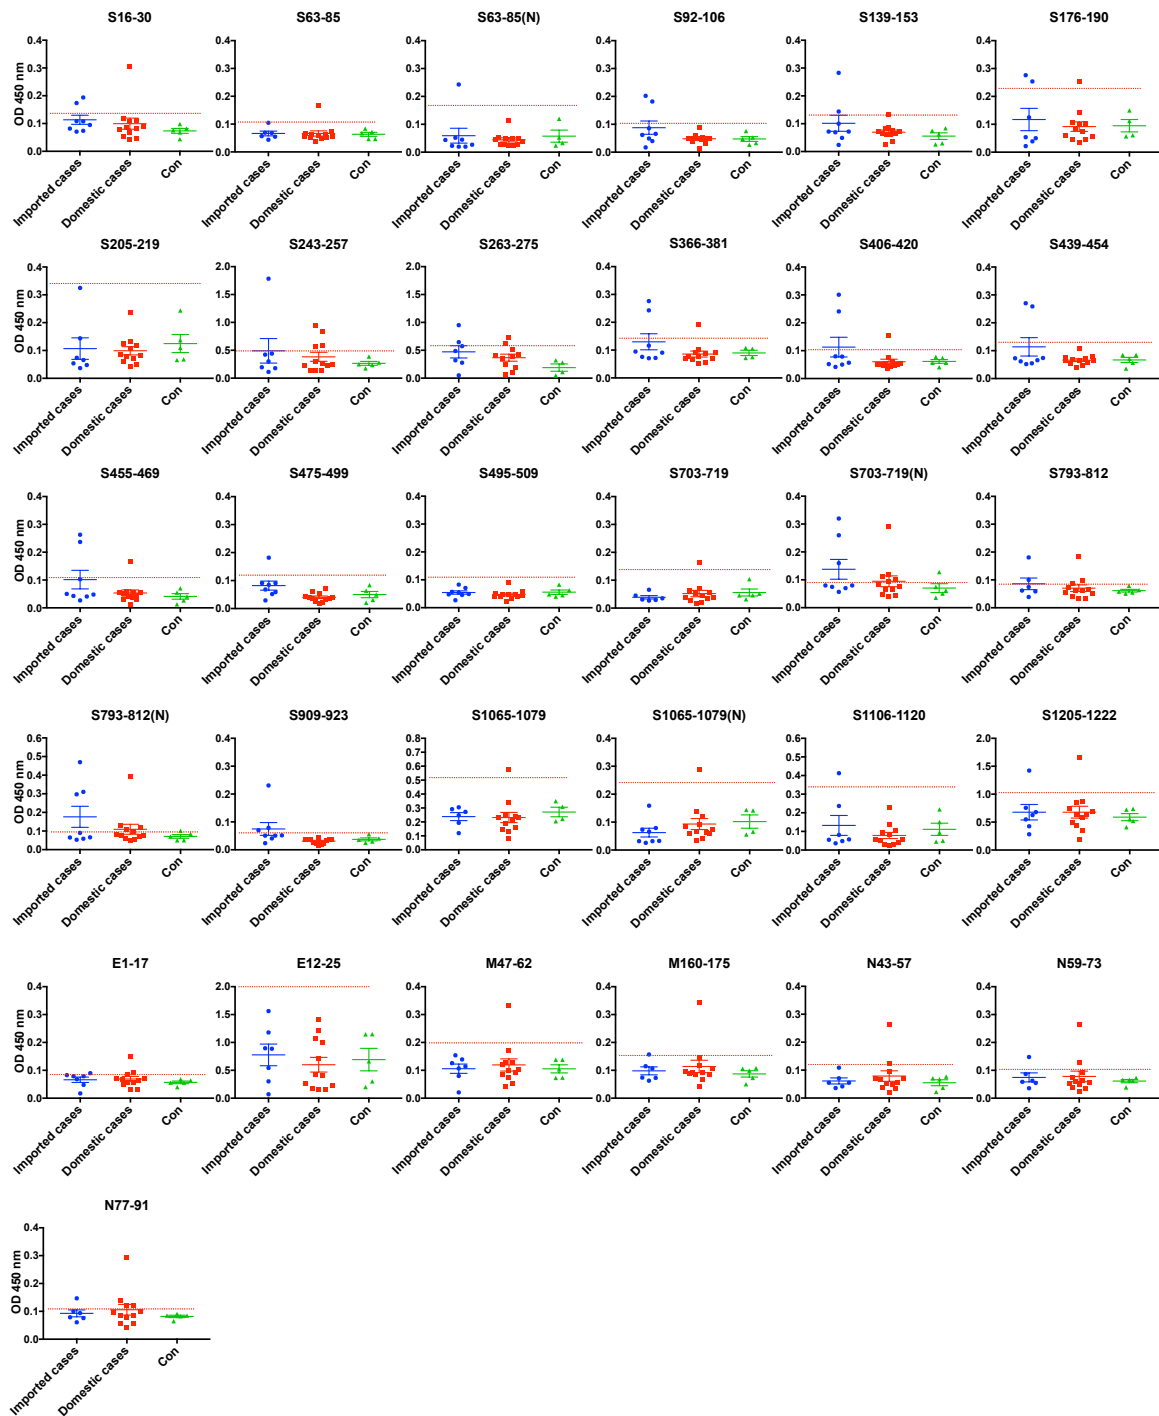

**Figure S3. The non-immunodominant epitopes against S, E, M, N in early convalescent sera from COVID-19 patients. Related to Figure 2.**

**Table S1. Predicted epitope peptides. Related to Figure 1.**

| Location      | Sequence                        | Homology |
|---------------|---------------------------------|----------|
| S16-30        | VNLTTTRTQLPPAYTN                | 33.30%   |
| S63-85        | TWFHAIHVSGTNGTKRFDNPVLP         | 60.90%   |
| S63-85(N)     | TWFHAIHVSGTNGTKRFDN(GlcNAc)PVLP | 60.90%   |
| S92-106       | FASTEKSNIIRGWIF                 | 100%     |
| S139-153      | PFLGVYYHKNNKSWM                 | 26.70%   |
| S176-190      | LMDLEGKQGNFKNLR                 | 73.30%   |
| S205-219      | SKHTPINLVRDLPQG                 | 73.30%   |
| S243-257      | ALHRSYLTPGDSSSG                 | 13.30%   |
| S263-275      | AAYYVGYLQPRTF                   | 92.30%   |
| S366-381      | SVLYNSASFSTFKCYG                | 93.70%   |
| S406-420      | EVRQIAPGQTGKIAD                 | 93.30%   |
| S439-454      | NNLDSKVGGNYNLYR                 | 62.50%   |
| S455-469      | LFRKSNLKPFERDIS                 | 86.70%   |
| S475-499      | AGSTPCNGVEGFNCYFPLQSYGFQP       | 48%      |
| S495-509      | YGFQPTNGVGYQPYPYR               | 80%      |
| S556-570      | NKKFLPFQQFGRDIA                 | 86.70%   |
| S675-689      | QTQTNSPRRARSVAS                 | 40%      |
| S703-719      | NSVAYSNNIAIPTNFT                | 94.10%   |
| S703-719(N)   | NSVAYSNNIAIPTN(GlcNAc)FT        | 94.10%   |
| S721-733      | SVTTEILPVSMTK                   | 100%     |
| S793-812      | PIKDFGGFNFSQILPDPSKP            | 85%      |
| S793-812(N)   | PIKDFGGFN(GlcNAc)FSQILPDPSKP    | 85%      |
| S909-923      | IGVTQNVLYENQKLI                 | 93.30%   |
| S1065-1079    | VTYVPAQEKNFTTAP                 | 100%     |
| S1065-1079(N) | VTYVPAQEKN(GlcNAc)FTTAP         | 100%     |
| S1106-1120    | QRNFYEPQIITDNT                  | 93.30%   |
| S1205-1222    | KYEQYIKWPWYIWLGFIA              | 100%     |
| E1-17         | MYSFVSEETGTLIVNSV               | 100%     |
| E12-25        | LIVNSVLLFLAFVV                  | 100%     |
| M47-62        | YIIKLIFLWLLWPVTL                | 100%     |
| M160-175      | DIKDLPKEITVATSRT                | 100%     |
| M183-197      | ASQRVAGDSGFAAYS                 | 86.70%   |
| N43-57        | QGLPNNTASWFTALT                 | 100%     |
| N59-73        | HGKEDLKFPRGQGV                  | 100%     |
| N77-91        | NSSPDDQIGYRRAT                  | 93.30%   |
| N152-170      | ANNAIVLQLPQGTTLPKG              | 89.40%   |
| N357-373      | IDAYKTFPPTPEPKDKK               | 100%     |

**Table S2. The Hydrodynamic Diameter and PDI of HBc-S-P VLPs. Related to Figure 1.**

|                                  |                   |                 |                  |                 |                 |                    |                 |                 |                    |                 |                   |                      |                   |
|----------------------------------|-------------------|-----------------|------------------|-----------------|-----------------|--------------------|-----------------|-----------------|--------------------|-----------------|-------------------|----------------------|-------------------|
| <b>Sample</b>                    | <b>S16-30</b>     | <b>S63-85</b>   | <b>S63-85(N)</b> | <b>S92-106</b>  | <b>S139-153</b> | <b>S176-190</b>    | <b>S205-219</b> | <b>S243-257</b> | <b>S263-275</b>    | <b>S366-381</b> | <b>S406-420</b>   | <b>S439-454</b>      | <b>S455-469</b>   |
| <b>PDI</b>                       | 0.08              | 0.07            | 0.18             | 0.19            | 0.04            | 0.06               | 0.05            | 0.01            | 0.04               | 0.01            | 0.01              | 0.01                 | 0.06              |
| <b>Hydrodynamic Diameter(nm)</b> | 48.0±13.0         | 37.3±10.0       | 39.8±13.0        | 45.5±14.5       | 45.0±8.5        | 45.1±10.7          | 44.7±10.2       | 46.7±4.7        | 44.2±8.7           | 45.9±12.2       | 45.7±3.4          | 44.8±10.8            | 45.4±3.8          |
| <b>Sample</b>                    | <b>S475-499</b>   | <b>S495-509</b> | <b>S556-570</b>  | <b>S675-689</b> | <b>S703-719</b> | <b>S703-719(N)</b> | <b>S721-733</b> | <b>S793-812</b> | <b>S793-812(N)</b> | <b>S909-923</b> | <b>S1065-1079</b> | <b>S1065-1079(N)</b> | <b>S1106-1120</b> |
| <b>PDI</b>                       | 0.02              | 0.21            | 0.04             | 0.03            | 0.10            | 0.09               | 0.03            | 0.06            | 0.14               | 0.04            | 0.06              | 0.04                 | 0.06              |
| <b>Hydrodynamic Diameter(nm)</b> | 44.8±9.1          | 45.5±10.8       | 46.6±8.8         | 45.6±8.3        | 34.9±11.2       | 35.4±11.0          | 45.2±7.9        | 37.9±9.5        | 41.6±15.3          | 44.8±9.0        | 37.2±8.8          | 37.9±9.5             | 48.0±12.1         |
| <b>Sample</b>                    | <b>S1205-1222</b> | <b>E1-17</b>    | <b>E12-25</b>    | <b>M47-62</b>   | <b>M160-175</b> | <b>M183-197</b>    | <b>N43-57</b>   | <b>N59-73</b>   | <b>N77-91</b>      | <b>N152-170</b> | <b>N357-373</b>   | <b>HBc-S</b>         |                   |
| <b>PDI</b>                       | 0.06              | 0.12            | 0.08             | 0.15            | 0.01            | 0.02               | 0.10            | 0.14            | 0.01               | 0.04            | 0.04              | 0.06                 |                   |
| <b>Hydrodynamic Diameter(nm)</b> | 45.1±11.4         | 35.4±13.1       | 34.1±9.3         | 48.0±10.5       | 37.1±3.7        | 44.3±6.1           | 39.4±12.6       | 39.3±7.4        | 44.7±4.7           | 43.8±6.0        | 36.7±7.4          | 36.7±5.2             |                   |

**Table S3. Characteristics of epitopes.** Related to Figure 1-3.

| Epitopes                                              | S protein                                                                                                                                       |                                         | N protein                                  | M protein                  | E protein      |
|-------------------------------------------------------|-------------------------------------------------------------------------------------------------------------------------------------------------|-----------------------------------------|--------------------------------------------|----------------------------|----------------|
|                                                       | non-glycosylation                                                                                                                               | Glycosylation                           |                                            |                            |                |
| Number                                                | 23                                                                                                                                              | 4                                       | 5                                          | 3                          | 2              |
| Conserved (>80% homology)                             | S92-106, S263-275, S366-381, S406-420, S455-469, S495-509, S556-570, S703-719, S721-733, S793-812, S909-923, S1065-1079, S1106-1120, S1205-1222 | S703-719(N), S793-812(N), S1065-1079(N) | N43-57, N59-73, N77-91, N152-170, N357-373 | M47-62, M160-175, M183-197 | E12-25, E55-69 |
| High immunogenicity (antibody titer>10 <sup>4</sup> ) | S16-30, S205-219, S455-469, S475-499, S556-570, S721-733, S793-812, S1106-1120, S1205-1222                                                      | S793-812(N)                             | N59-73, N353-373                           | M47-62                     | E12-25         |
| Immunodominant                                        |                                                                                                                                                 |                                         |                                            |                            |                |
| Imported cases*                                       | S675-689, S721-733                                                                                                                              | None                                    | N152-170                                   | None                       | None           |
| Domestic cases*                                       | S556-570                                                                                                                                        | None                                    | N357-373, N152-170                         | M183-197                   | None           |
| Neutralizing                                          |                                                                                                                                                 |                                         |                                            |                            |                |
| D614 SARS-CoV-2                                       | S16-30, S92-106, S139-153, S243-275, S406-420, S439-454, S455-469, S475-499, S556-570, S909-923                                                 | S793-812(N)                             | NT <sup>a</sup>                            | NT                         | NT             |
| G614 SARS-CoV-2                                       | S63-85, S92-106, S139-153, S406-420, S439-454, S455-469, S475-499, S495-509, S675-689, S703-719, S793-812, S909-923, S1065-1079, S1106-1120     | S703-719(N), S793-812(N), S1065-1079(N) | NT                                         | NT                         | NT             |

\*Imported (Europe) cases infected SARS-CoV-2 in early April, 2020 and domestic (China) cases in early February, 2020

<sup>a</sup>NT represents not tested







## E protein

```
SARS-CoV-2 MYSFVSEETGTLIVNSVLLFLAFVVFLLVTLAILTALRLCAYCCNIVNVSLVKPSFYVYS
RaTG13 MYSFVSEETGTLIVNSVLLFLAFVVFLLVTLAILTALRLCAYCCNIVNVSLVKPSFYVYS
SARS-CoV MYSFVSEETGTLIVNSVLLFLAFVVFLLVTLAILTALRLCAYCCNIVNVSLVKPTVYVYS
*****:*****

SARS-CoV-2 RVKNLNSSR-VPDLLV
RaTG13 RVKNLNSSR-VPDLLV
SARS-CoV RVKNLNSESEGVDPDLLV
*****.*****
```

## N Protein

```
SARS-CoV-2 MSDNGPQ-NQRNAPRITFGGPSDSTGSNQNNGERSGARSKQRRPQGLPNNTASWFTALTQH
RaTG13 MSDNGPQ-NQRNAPRITFGGPSDSTGSNQNNGERSGARPKQRRPQGLPNNTASWFTALTQH
SARS-CoV MSDNGPQSNQRSAPRITFGGPTDSTDNNQNGGRNGARPKQRRPQGLPNNTASWFTALTQH
***** **.******:***.* **.* **.* *****

SARS-CoV-2 GKEDLKFRPGQGVFINTNSSPDDQIGYRRATRRIRGGDGKMKDLSRWYFYLLGTGPEA
RaTG13 GKEDLKFRPGQGVFINTNSSPDDQIGYRRATRRIRGGDGKMKDLSRWYFYLLGTGPEA
SARS-CoV GKELRFRPGQGVFINTNSGPDDQIGYRRATRRVIRGGDGKMKELSPRWYFYLLGTGPEA
**.*:*****.*****:*****:*****:*****

SARS-CoV-2 GLPYGANKDGIWVATEGALNTPKDHIIGTRNPANNAIVLQLPQGTTLPKGFYAEGSRGG
RaTG13 GLPYGANKDGIWVATEGALNTPKDHIIGTRNPANNAIVLQLPQGTTLPKGFYAEGSRGG
SARS-CoV SLPYGANKGIVVWVATEGALNTPKDHIIGTRNPANNAATVQLPQGTTLPKGFYAEGSRGG
.*****:*.***** **.* *****

SARS-CoV-2 SQASSRSSRSRNSRNSTPGSSRGTS PARMAGNGGDAALALLLDRLNQLESKMSGKGQ
RaTG13 SQASSRSSRSRNSRNSTPGSSRGTS PARMAGNGS DAALALLLDRLNQLESKMSGKGQ
SARS-CoV SQASSRSSRSRNSRNSTPGSSRGNS PARMASGGGTALALLLDRLNQLESKMSGKGQ
*****.*****.*****.***:*****:*****

SARS-CoV-2 QQQGQTVTKKSAEASKKPRQKRTATKAYNVTQAFGRRGPEQTQGNFGDQELIRQGTDYK
RaTG13 QQQSQTVTKKSAEASKKPRQKRTATKQYNVTQAFGRRGPEQTQGNFGDQELIRQGTDYK
SARS-CoV QQQGQTVTKKSAEASKKPRQKRTATKQYNVTQAFGRRGPEQTQGNFGDQDLIRQGTDYK
**.* *****

SARS-CoV-2 HWPQIAQFAPSASAFFGMSRIGMEVTPSGTWLTYTGAIKLDDKDPNFKDQVILLNKHIDA
RaTG13 HWPQIAQFAPSASAFFGMSRIGMEVTPSGTWLTYTGAIKLDDKDPNFKDQVILLNKHIDA
SARS-CoV HWPQIAQFAPSASAFFGMSRIGMEVTPSGTWLTYHGAIKLDDKDPQFKDNVILLNKHIDA
*****:*****:*****

SARS-CoV-2 YKTFPPTPEPKKDKKKADETTQALPQRQKQQTVTLLPAADLDFSKQLQQSMSSADSTQA
RaTG13 YKTFPPTPEPKKDKKKADETTQALPQRQKQQTVTLLPAADLDFSKQLQQSMSSADSTQA
SARS-CoV YKTFPPTPEPKKDKKKTDEAQPLPQRQKQPTVTLLPAADMDDFSRQLQNSMSGASADST
*****:***.* ***** *****:*****:*****:***.*:***.*

SARS-CoV-2 --
RaTG13 --
SARS-CoV QA
```

**Data S1. Homology of the predicted epitopes of S, M, E, N proteins among SARS-CoV-2, SARS-CoV and bat coronavirus RaTG13. Related to Figure 1.**
