# Supplementary material
Source: PubMed Central journal article supplement (PMC7837128)
Supplement: mmc2.pdf [file mmc2.pdf]

# The immunodominant and neutralization linear epitopes for SARS-CoV-2

## Graphical Abstract

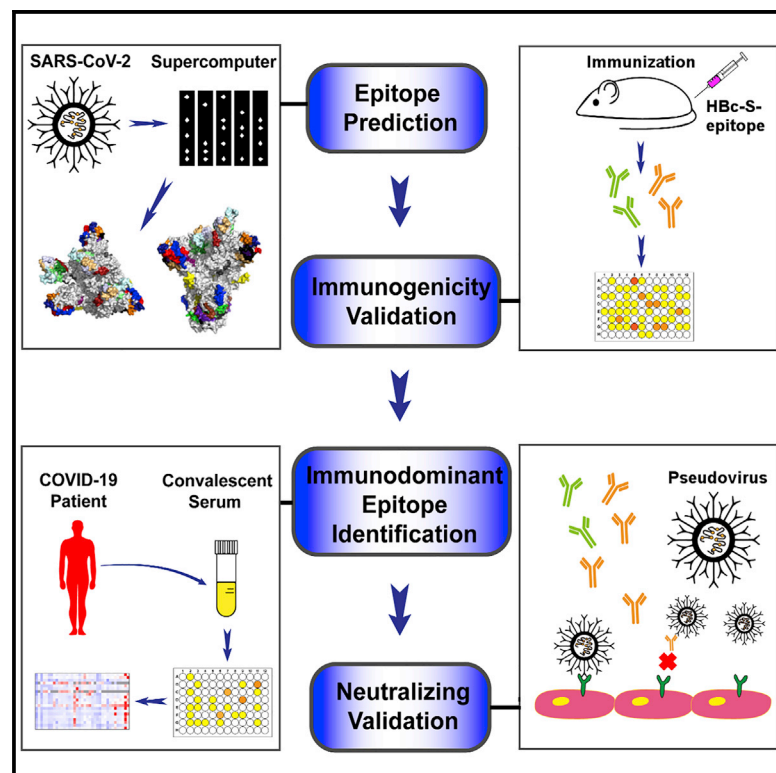

## Authors

Shuai Lu, Xi-xiu Xie, Lei Zhao, ..., Bi-xia Ke, Chun-guo Jiang, Rui-tian Liu

## Correspondence

jiang\_cg@163.com (C.-g.J.),  
rtliu@ipe.ac.cn (R.-t.L.)

## In Brief

Lu et al. predict and validate B cell epitopes on the spike (S), envelope (E), membrane (M), and nucleocapsid (N) proteins of SARS-CoV-2 using structure-based approaches. The immunodominant epitopes vary between D614 and G614 SARS-CoV-2. The epitopes on the S protein elicit neutralizing antibodies against D614 and G614 SARS-CoV-2.

## Highlights

- B cell epitopes of SARS-CoV-2 are obtained using structure-based approaches
- The predicted epitopes effectively induce robust antibody responses
- D614 and G614 SARS-CoV-2 display different immunodominant epitopes
- Epitopes on S protein elicit D614 and/or G614 SARS-CoV-2-neutralizing antibodies

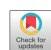

## Report

# The immunodominant and neutralization linear epitopes for SARS-CoV-2

Shuai Lu,<sup>1,2,9</sup> Xi-xiu Xie,<sup>1,2,9</sup> Lei Zhao,<sup>3,9</sup> Bin Wang,<sup>1,2</sup> Jie Zhu,<sup>1,2</sup> Ting-rui Yang,<sup>1,2</sup> Guang-wen Yang,<sup>4</sup> Mei Ji,<sup>1</sup> Cui-ping Lv,<sup>1</sup> Jian Xue,<sup>3</sup> Er-wei Dai,<sup>3</sup> Xi-ming Fu,<sup>5,6</sup> Dong-qun Liu,<sup>1</sup> Lun Zhang,<sup>1</sup> Sheng-jie Hou,<sup>1</sup> Xiao-lin Yu,<sup>1,2</sup> Yu-ling Wang,<sup>3</sup> Hui-xia Gao,<sup>3</sup> Xue-han Shi,<sup>3</sup> Chang-wen Ke,<sup>7</sup> Bi-xia Ke,<sup>7</sup> Chun-guo Jiang,<sup>8,\*</sup> and Rui-tian Liu<sup>1,2,10,\*</sup>

<sup>1</sup>National Key Laboratory of Biochemical Engineering, Institute of Process Engineering, Chinese Academy of Sciences, Beijing 100190, China

<sup>2</sup>Innovation Academy for Green Manufacture, Chinese Academy of Sciences, Beijing 100190, China

<sup>3</sup>Second Department of Internal Medicine, Shijiazhuang Fifth Hospital, Shijiazhuang 050021, China

<sup>4</sup>Department of Computer Science and Technology, Tsinghua University, Beijing 100084, China

<sup>5</sup>The Chinese University of Hong Kong, Shenzhen 518172, China

<sup>6</sup>University of Science and Technology, Hefei 230026, China

<sup>7</sup>Guangdong Provincial Center for Disease Control and Prevention, Guangzhou 511430, China

<sup>8</sup>Department of Respiratory and Critical Care Medicine, Beijing Institute of Respiratory Medicine, Beijing Chaoyang Hospital, Capital Medical University, Beijing 100020, China

<sup>9</sup>These authors contributed equally

<sup>10</sup>Lead contact

\*Correspondence: [jiang\\_cg@163.com](mailto:jiang_cg@163.com) (C.-g.J.), [rtliu@ipe.ac.cn](mailto:rtliu@ipe.ac.cn) (R.-t.L.)

<https://doi.org/10.1016/j.celrep.2020.108666>

## SUMMARY

Although vaccines against severe acute respiratory syndrome coronavirus 2 (SARS-CoV-2) are under development, the antigen epitopes on the virus and their immunogenicity are poorly understood. Here, we simulate the 3D structures and predict the B cell epitopes on the spike (S), envelope (E), membrane (M), and nucleocapsid (N) proteins of SARS-CoV-2 using structure-based approaches and validate epitope immunogenicity by immunizing mice. Almost all 33 predicted epitopes effectively induce antibody production, six of these are immunodominant epitopes in individuals, and 23 are conserved within SARS-CoV-2, SARS-CoV, and bat coronavirus RaTG13. We find that the immunodominant epitopes of individuals with domestic (China) SARS-CoV-2 are different from those of individuals with imported (Europe) SARS-CoV-2, which may be caused by mutations on the S (G614D) and N proteins. Importantly, we find several epitopes on the S protein that elicit neutralizing antibodies against D614 and G614 SARS-CoV-2, which can contribute to vaccine design against coronaviruses.

## INTRODUCTION

The coronavirus disease 2019 (COVID-19) pandemic caused by the novel severe acute respiratory syndrome coronavirus 2 (SARS-CoV-2) has had an unprecedented effect on global health. SARS-CoV-2 shares 79.5% of genomic sequence identity with SARS-CoV, but it is more contagious than SARS-CoV (Lu et al., 2020; Zhou et al., 2020). Prophylactic vaccines are an important means to curb pandemics of infectious diseases. Accordingly, an effective and safe SARS-CoV-2 vaccine are needed urgently. Several SARS-CoV-2 vaccine candidates, based on a variety of technologies, are being tested in clinical trials (Chen et al., 2020a; Thanh Le et al., 2020). However, the epitopes on these vaccines and SARS-CoV-2 are not well studied, and it is still urgent to identify epitopes that can elicit neutralizing antibodies and determine the immunodominant epitopes in humans for improvement and design of novel vaccines.

Four major structural proteins—spike (S), envelope (E), membrane (M), and nucleocapsid (N)—play vital roles in entry and replication of the virus (Chen et al., 2020b). Several epitopes

on the S protein have been reported with little information regarding immunogenicity and neutralization, but most epitopes on the M, E, and N proteins remain unknown (Baruah and Bose, 2020; Bhattacharya et al., 2020; Yuan et al., 2020). The accuracy of the predicted epitopes using *in silico* methods is unclear, and the immunogenicity of the obtained epitopes needs further experimental verification (Ahmed et al., 2020; Grifoni et al., 2020; Kiyotani et al., 2020). Epitope prediction methods based on the 3D structure of a protein can greatly improve the precision of antigen epitopes (Jespersen et al., 2017). Therefore, the reported 3D structures of the S and M proteins are conducive for epitope prediction (Jin et al., 2020; Lan et al., 2020; Walls et al., 2020; Wrapp et al., 2020). Although the structures of the E and N proteins are still unsolved, it is possible to model these protein structures based on their reported gene sequence using molecular simulation and then predict their epitopes (Lu et al., 2020). Increasing evidence shows that some linear epitopes, as sites of virus vulnerability, conserved regions, or key components of conformational epitopes, play important roles in induction of virus neutralization (Alphs et al., 2008; Sok and Burton,

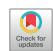

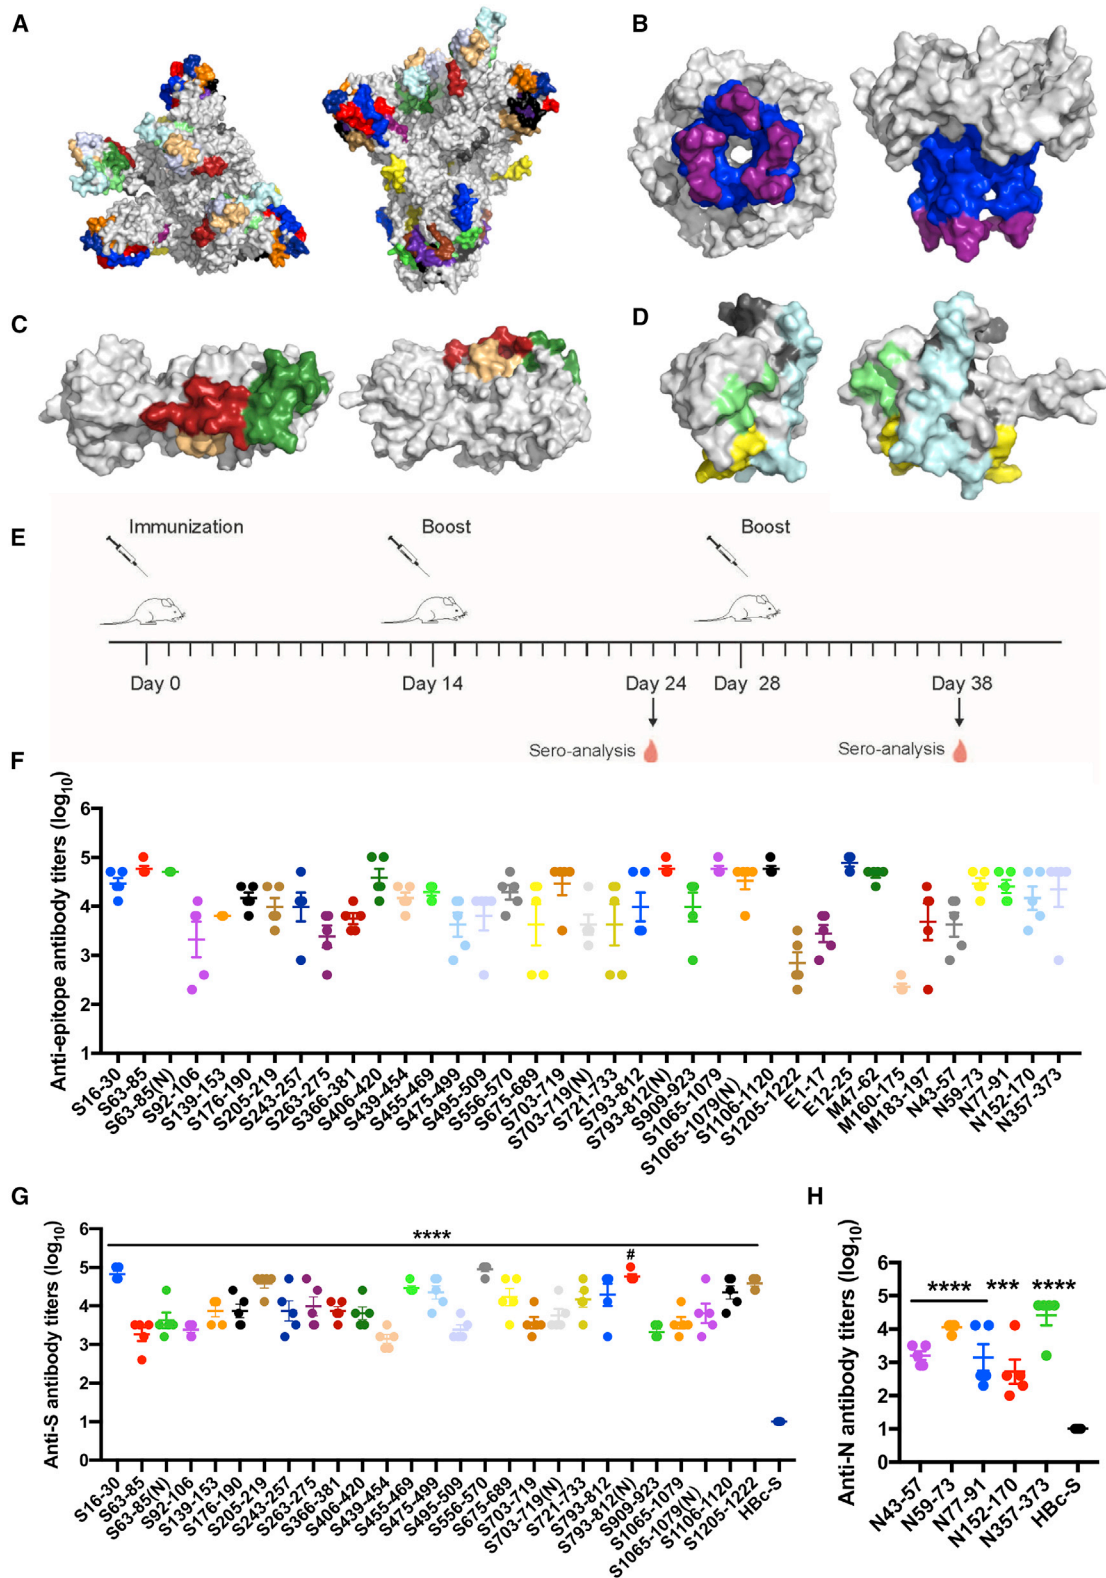

**Figure 1. Prediction and validation of epitopes on SARS-CoV-2**

(A–D) Molecular simulated structures and predicted epitopes of major proteins of SARS-CoV-2. Shown are top and side views of 3D structures (gray) and the predicted epitopes (colored) of the spike (S) protein (A), envelope (E) protein (B), membrane (M) protein (C), and nucleocapsid (N) protein (D).

(legend continued on next page)

2018; Xu et al., 2018). For example, a linear epitope of HIV induced a broad-spectrum protection effect and could be used to develop universal vaccines (Kong et al., 2019). By identifying conformational B cell epitopes with a higher degree of continuity and the appropriate linear window with key functional residues of discontinuous B cell epitopes centralized and randomized, we may find the key components of conformational epitopes.

The immunogenicity, immunodominance, and especially neutralization of the epitopes are crucial for development of effective SARS-CoV-2 vaccines. Although the epitope immunodominance landscape of the S protein has been mapped (Zhang et al., 2020), mutation of virus proteins might alter the antigenicity of the virus and possibly affect human immune responses to the epitopes, making it a central challenge for vaccine development. Phylogenetic analysis showed that SARS-CoV-2 mutates with a mutation rate around  $1.8 \times 10^{-3}$  substitutions per site per year (Li et al., 2020). Within all identified mutations of the S protein, further investigation of the 614<sup>th</sup> amino acid is needed. G614 in the S1 protein of SARS-CoV-2, found in almost all individuals with COVID-19 outside of China, causes a higher fatality rate and might be more easily spread than D614, which is mainly found in China (Becerra-Flores and Cardozo, 2020; Korber et al., 2020). The 614<sup>th</sup> amino acid is located on the surface of the S protein protomer, and G614 destabilizes the conformation of the viral spike and facilitates binding of the S protein to ACE2 on human host cells (Becerra-Flores and Cardozo, 2020). However, little is known about how G614 influences human immune responses to SARS-CoV-2. In fact, mutations not only on the S protein but also on the E, M, and N proteins might affect human immune responses to the virus. The limited neutralizing effect by a vaccine using the S protein as the only antigen suggests that epitopes on the E, M, and N proteins might also be important for SARS-CoV-2 vaccine design, and it is necessary to understand how mutations affect human immune responses to the virus (van Doremalen et al., 2020).

In this study, we predicted and synthesized the B cell epitopes on the surface of the S, M, E, and N proteins of SARS-CoV-2, prepared 37 vaccines based on hepatitis B core protein (HBc) virus-like particles (VLPs) using the SpyCatcher/SpyTag system, validated the immunogenicity of the epitopes by immunizing mice, and identified epitopes that could elicit neutralizing antibodies. We also determined immunodominant epitopes on SARS-CoV-2 by mapping the epitopes with sera from COVID-19 convalescent individuals and analyzed the relevance of epitope immunodominance and the mutations on SARS-CoV-2 proteins.

## RESULTS

### Prediction of SARS-CoV-2 B cell epitopes and preparation of HBc-S VLPs displayed with the epitopes

To predict antigen epitopes on SARS-CoV-2, we used a high-performance computer to simulate the 3D structures of the S,

M, E, N proteins and then used computational simulation calculations to obtain preliminary antigen epitope information based on epitope surface accessibility. Spatial structure information of the S, M, E, and N protein structure models was obtained (Figures 1A–1D); the structures of S and M proteins were consistent with the reported structures, and the structures of the E and N proteins were obtained for the first time (Wrapp et al., 2020; Yan et al., 2020). A total of 33 B cell epitopes were predicted on the basis of protein structures, and during the selection process, priority was given to select sequences with high homology within the SARS-CoV and RaTG13 coronavirus strains (Table S1; Data S1). Within these epitopes, four contained glycosylation sites (Watanabe et al., 2020; Wrapp et al., 2020), and the corresponding GlcNAc glycosylated epitopes were synthesized (Table S1); 13 from the S protein, two from the E protein, three from the M protein, and five from the N protein are conserved with more than 80% homology among SARS-CoV-2, SARS-CoV, and bat coronavirus RaTG13, respectively (Table S1). All epitopes were exposed on the surface of the virus proteins (Figures 1A–1D) and had a high antigenicity score, indicating their potential for initiating immune responses. Therefore, they were considered to be promising epitope candidates against B cells for vaccine preparation.

The predicted epitope peptides of the S, M, E, and N proteins were synthesized and conjugated onto the surface of HBc-SpyCatcher (HBc-S) VLPs via SpyCatcher/SpyTag isopeptide formation, forming epitope peptides displaying HBc-S VLPs called HBc-S-P VLPs. SDS-PAGE confirmed that the epitope peptides were conjugated successfully onto HBc-S VLPs, as shown by HBc monomers with higher molecular weight (Figure S1A). Our transmission electron microscopy (TEM) results showed that all HBc-S-P self-assembled into morphologically correct VLPs (Figure S1B). We further assessed the hydrodynamic diameter of HBc-S-P VLPs by dynamic light scattering (DLS), and the results showed that all HBc-S-P VLPs were relatively uniform (polydispersity index ([PDI] < 0.25) with a diameter around 40 nm (Figure S1C; Table S2), consistent with previous reports (Ji et al., 2020).

### The epitopes elicit highly specific antibody responses

To assess immunogenicity, the HBc-S-P VLPs were administered subcutaneously to BALB/c mice three times, and the serum antibody titers were assayed by ELISA (Figure 1E). Epitopes S455–469, S556–570, E12–25, M47–62, N59–73, and N357–373 elicited robust antibody responses against peptides and/or the S and N proteins in mice 10 days after the second injection ( $\geq 1,000$ ; Figure S2). All predicted epitopes boosted antibodies response against the corresponding epitope peptides, and the antibody titer reached at least 1,000 after the third immunization, except for M160–170, whose antibody titer was only 230 (Figure 1F). Accordingly, epitopes S16–30, S205–219, S455–469, S475–499, S556–570, S721–733, S793–812,

(E–H) Epitope-conjugated HBc-S VLPs induce high antibody titers against epitope peptides and SARS-CoV-2 proteins.

(E) Schematic of the immunization design.

(F–H) 96-well plates were coated with peptides (F) and S (G) and N (H) proteins.

Data are shown as mean  $\pm$  SEM (compared with the HBc-S control; \*\*\*p < 0.001; \*\*\*\*p < 0.0001; one-way ANOVA followed by Dunnett's test; compared with non-glycosylated epitope; #p < 0.05; Student's t test).



**Table 1. Characteristics of Individuals with COVID-19**

| Group          | Case          | Sex | Age | Country        | S mutation | N mutation   |
|----------------|---------------|-----|-----|----------------|------------|--------------|
| Imported cases | individual 1  | M   | 47  | Denmark        | NT         | NT           |
|                | individual 2  | M   | 19  | Russia         | G614       | R203G204     |
|                | individual 3  | M   | 23  | United Kingdom | D614       | R203G204     |
|                | individual 4  | F   | 17  | United Kingdom | NT         | NT           |
|                | individual 5  | M   | 19  | United Kingdom | G614       | K203R204     |
|                | individual 6  | F   | 49  | Russia         | G614       | K203R204     |
|                | individual 7  | M   | 50  | Russia         | G614       | K203R204     |
|                | individual 8  | F   | 21  | United Kingdom | G614       | G189R203G204 |
| Domestic cases | individual 9  | M   | 42  | China          | D614       | R203G204     |
|                | individual 10 | M   | 72  | China          | D614       | R203G204S344 |
|                | individual 11 | M   | 56  | China          | NT         | NT           |
|                | individual 12 | M   | 66  | China          | D614       | R203G204     |
|                | individual 13 | F   | 40  | China          | D614       | R203G204     |
|                | individual 14 | F   | 34  | China          | NT         | NT           |
|                | individual 15 | F   | 60  | China          | D614       | R203G204     |
|                | individual 16 | F   | 44  | China          | NT         | NT           |
|                | individual 17 | M   | 67  | China          | D614       | R203G204     |
|                | individual 18 | F   | 67  | China          | D614       | R203G204     |
|                | individual 19 | F   | 10  | China          | NT         | NT           |
|                | individual 20 | F   | 51  | China          | NT         | NT           |

NT, not tested.

S1106–1120, S1205–1222, N59–73, and N353–373 on the S and N proteins also induced robust antibodies with titers greater than 10,000 against the S and N proteins, respectively (Figures 1G and 1H). These results demonstrated that almost all predicted epitopes on the S, M, E, and N proteins elicited immune responses with high levels of antibodies, suggesting that these epitopes have good immunogenicity. The GlcNAc glycosylated epitopes also elicited sufficient amounts of antibodies toward the corresponding epitope peptides and S protein, and only S793–812(N) induced more antibodies than the non-glycosylated epitope (Figures 1F and 1G).

#### Imported and domestic COVID-19 cases have different immunodominant epitopes

To investigate the spectrum of antibodies in individuals with COVID-19, we detected binding of early convalescent sera of eight individuals with imported (Europe) COVID-19 who were infected with SARS-CoV-2 in early April, 2020 and 12 individuals with domestic (China) COVID-19 who were infected in early February, 2020 to various epitopes (Table 1). The mean value plus three times the standard deviation in healthy volunteers was used as the cutoff value to define positive reactions, and an epitope showing an average positive rate of 50% or more among individuals was considered an immunodominant epitope (Figures 2A and S3). Our results showed that S556–570, M183–197, and N357–373 were immunodominant in individuals with domestic COVID-19 (Figures 2B–2D), whereas S675–689 and S721–733 were immunodominant in imported COVID-19 groups (Figures 2E and 2F). Only N152–170 was immunodominant in both groups (Figure 2G). Notably, S556–570, N152–170, and

S721–733 reacted with the sera of almost all individuals ( $\geq 80\%$ ) with domestic or imported COVID-19 (Figures 2B, 2F, and 2G). These results indicated that imported and domestic COVID-19 had different immunodominant epitopes.

To elucidate the possible cause of the difference in immunodominant epitopes, we sequenced the S and N genes of SARS-CoV-2 from individuals with imported and domestic COVID-19, respectively. We found that the gene sequences of imported and domestic strains contained G614 or D614 in the S protein and K203R204/G189R203G204/R203G204/R203G204S344 in the N protein, respectively (Table 1), which may result in different immunodominant epitopes of different virus sub-strains.

#### The predicted epitopes induce neutralization antibody production

The SARS-CoV-2 pseudovirus neutralization assay is a well-accepted method to detect the ability of a vaccine to inhibit SARS-CoV-2 infection (Ni et al., 2020; Wang et al., 2020). To assess neutralization antibodies induced by S protein epitopes, we incubated the immunization sera with D614 or G614 SARS-CoV-2 pseudoviruses, and then the mixture was added to ACE2-293T cells that stably expressed ACE2. The results showed that immunized sera of the S92–106, S139–153, S439–454, and S455–469 epitopes inhibited SARS-CoV-2 pseudovirus infection compared with the HBc-S control ( $p < 0.0001$ ), with inhibition rates around 40%–50% (Figure 3A). The sera of S16–30, S243–257, S406–420, S475–499, S556–570, S793–812(N), and S909–923 inhibited SARS-CoV-2 infection with an inhibition rate of 20%–40% (Figure 3A), indicating that these 11

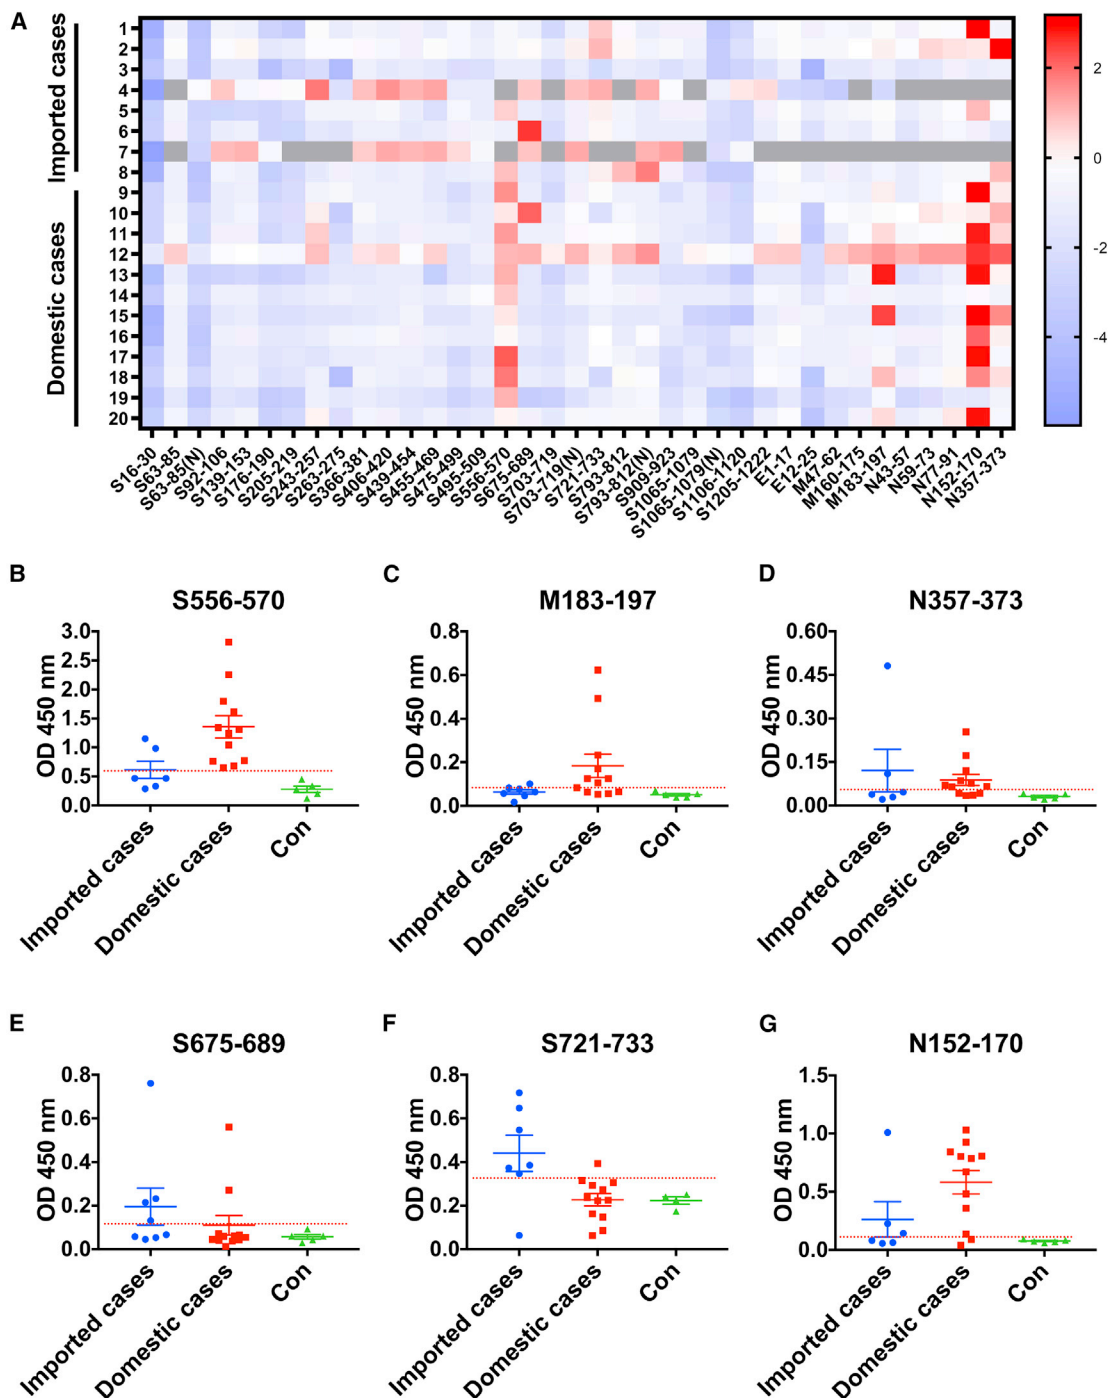

**Figure 2. Imported and domestic COVID-19 have different immunodominant epitopes**

(A) The landscape of adjusted epitope-specific antibody levels in early convalescent sera of individuals with imported and domestic COVID-19. Gray indicates not tested.

(B–G) Immunodominant epitopes binding with the antibodies in early convalescent sera from individuals with imported and domestic COVID-19. Data are shown as mean  $\pm$  SEM. The cutoff lines were based on the mean value plus 3 SD in 4–5 healthy persons.

epitopes induced neutralization antibody production. To detect the effect of epitope immunization on the neutralizing responses of G614 SARS-CoV-2, we incubated the epitope-immunized

sera with the G614 SARS-CoV-2 pseudoviruses. The results showed that sera of epitopes inhibiting D614 SARS-CoV-2 also inhibited G614 SARS-CoV-2 infection, except for S16–30,

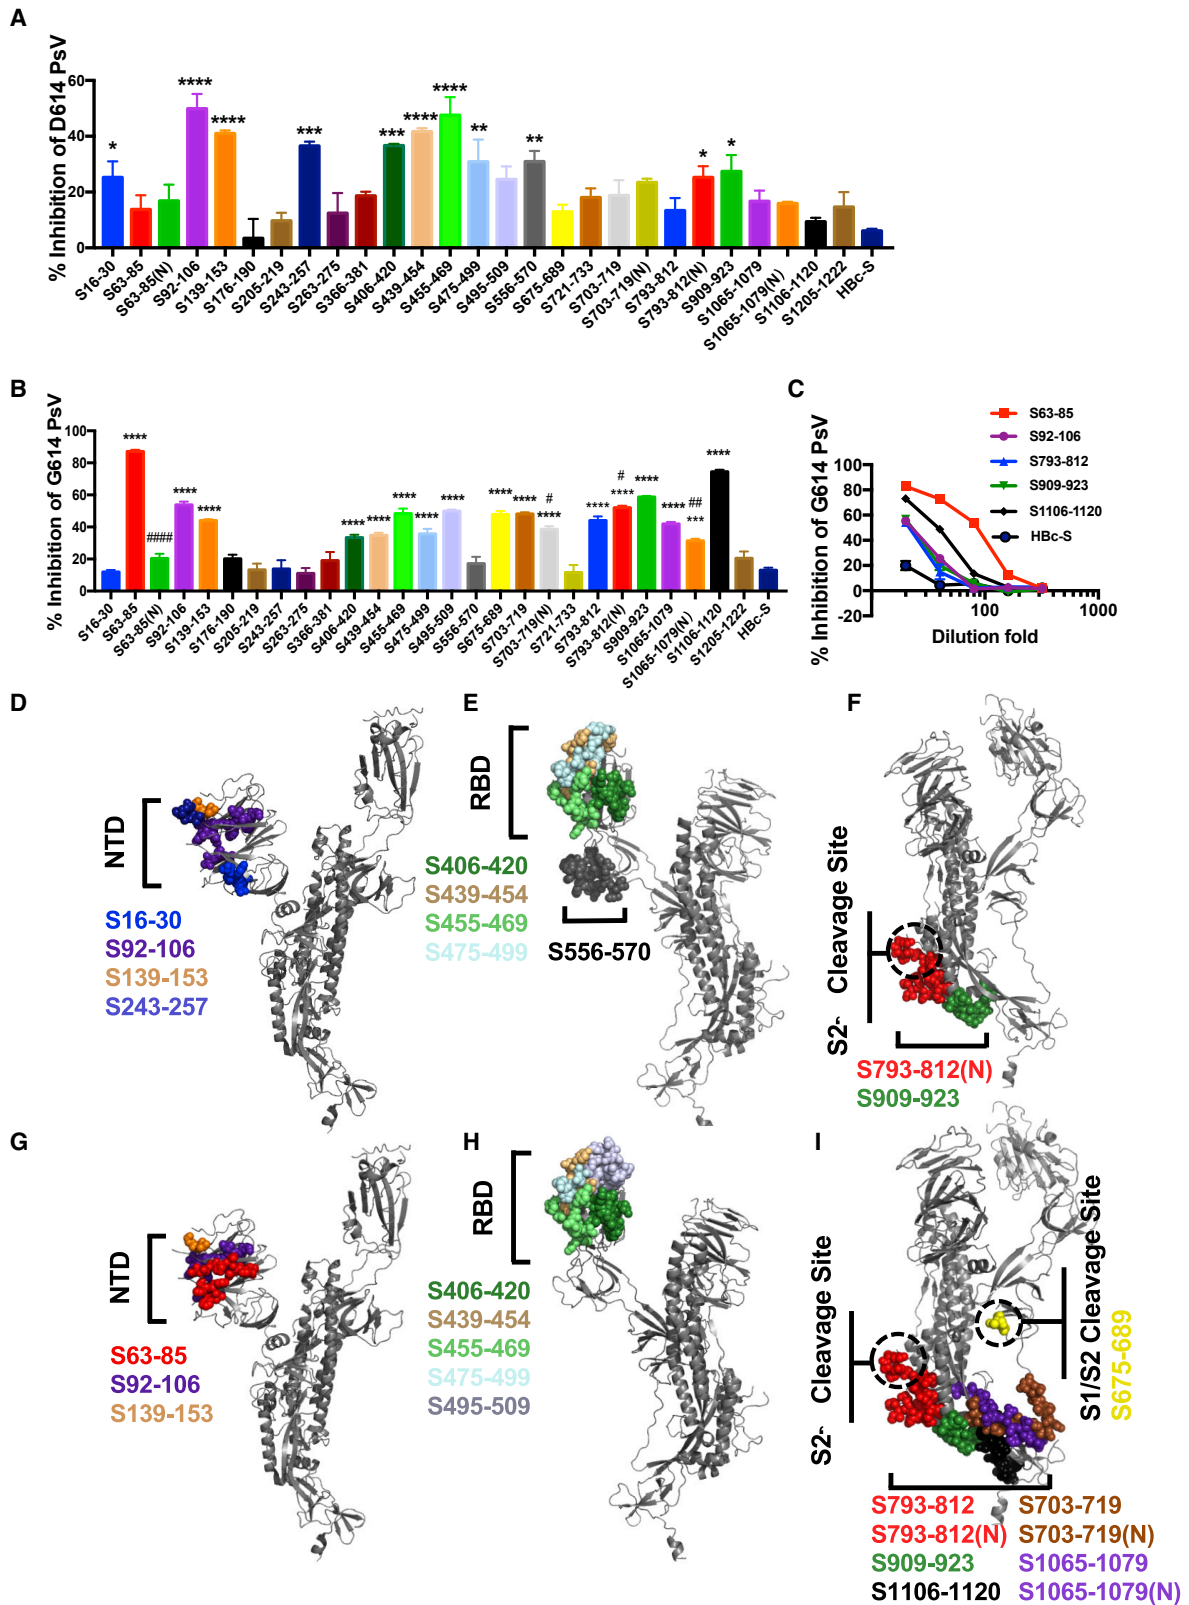

(legend on next page)

S243–257, and S556–570 (Figure 3B). However, the immunized sera of epitopes S63–85, S495–509, S675–689, S703–719, S793–812, S1065–1079, S1065–1079(N), and S1106–1120 only inhibited G614 SARS-CoV-2 pseudovirus infection. Interestingly, compared with the non-glycosylation epitope, S63–85(N), S703–719(N), and S1065–1079(N) induced fewer neutralizing antibodies to the G614 pseudovirus, whereas those of S793–812(N) increased (Figure 3B). We then 2-fold serially diluted sera with an inhibition rate of more than 50% and determined the neutralizing antibody titers induced by these epitopes. S63–85 induced the highest neutralizing effect with an antibody titer at 1:80 (Figure 3C). The structural analysis showed that most of these neutralizing epitopes to D614 and G614 SARS-CoV-2 were in or near the N-terminal domain (NTD), receptor-binding domain (RBD), or S2' cleavage site of the S protein and were spatially clustered (Figures 3D–3I), except S675–689, which was in or near the S1/S2 cleavage site at the interface of the S1 and S2 subunits of the S protein (Figure 3I).

## DISCUSSION

In this study, we used a high-performance computer to simulate the 3D structures of major proteins on SARS-CoV-2 and predicted 33 surface area epitopes using the modeled protein structures, which proved to be efficient and accurate by mouse immunization and pseudovirus neutralization assay. Of the 33 identified epitopes, 24 were conserved with more than 80% homology, and 18 shared more than 90% homology between SARS-CoV-2, SARS-CoV, and bat coronavirus RaTG13 (Table S1), suggesting that these epitopes could be used for designing broad-spectrum betacoronavirus vaccines.

Some surface area epitopes of SARS-CoV-2 were determined to be immunodominant in the present study. Consistent with a previous report, S556–570 was an immunodominant epitope was able to elicit neutralizing antibodies (Figure 3A; Poh et al., 2020). S675–689 and S721–733 were immunodominant epitopes in imported strains but not in domestic strains, which may result from antigenic drift by the 614<sup>th</sup> amino acid variance on the S protein of SARS-CoV-2 between imported and domestic cases. In most imported cases, glycine was in the 614<sup>th</sup> position of the S protein, which possibly made the S675–689 and S721–733 regions more accessible by specifically destabilized the “up” state of the viral spike via unpacking with T859 in the adjacent helical stalk (Becerra-Flores and Cardozo, 2020). Moreover, S556–570 was no longer an immunodominant and neutralizing epitope in the G614 strain, and the antibodies induced by S675–689 inhibited G614 but not D614 pseudovirus entry into ACE2-expressing 293T cells, suggesting that antigenic drift was caused by the D614G mutation. Two epitopes, N152–170 and N357–373, are highly conserved among SARS-CoV-2,

SARS-CoV, and bat coronavirus RaTG13. Consistent with previous reports, these two epitopes were immunodominant sites (Guo et al., 2004). Importantly, they bound to neutralizing antibodies in recovered SARS-CoV individuals (Guo et al., 2004; Shichijo et al., 2004). M183–197 is another immunodominant epitope in domestic cases. Because this epitope is located in the S4 subsite of the active center of the M protein, it is possible for it to elicit neutralizing antibodies that inhibit the protease function of the M protein (Dai et al., 2020; Yang et al., 2005).

The antibodies induced by S406–420, S439–454, S455–469, and S475–499 but not S366–381 or S495–509 in the RBD region had a neutralizing effect on the D614 and G614 pseudoviruses, consistent with the interaction interface between the SARS-CoV-2 receptor-binding motif (RBM) and ACE2 (Seydoux et al., 2020; Shang et al., 2020), indicating that these epitopes are suitable for designing universal vaccines. Consistent with previous reports, the antibodies induced by epitope S366–381 did not have a neutralizing effect on entry of the pseudovirus (Wrapp et al., 2020; Yuan et al., 2020). Interestingly, not only antibodies targeting the interaction interface between the RBD and ACE2 but also antibodies binding with the NTD of the S protein, such as S16–30, S92–106, S139–153, and S243–257, had a neutralizing effect on the D614 strain. Of the neutralizing NTD epitopes, S92–106 and S139–153 also had a neutralizing effect on the G614 strain. Antibodies induced by S63–85, but not its glycosylated form, inhibited cell entry of the G614 pseudovirus rather than the D614 pseudovirus, and the epitopes S703–719(N) and S1064–1079(N) induced fewer neutralizing antibodies compared with the unglycosylated ones, indicating that native oligomannose and complex-type N-glycan might have a shield effect on the epitope and that mutation at the 614<sup>th</sup> position possibly affected exposure of the epitope by altering the pose of the glycan shield (Barnes et al., 2018). In contrast, the glycosylated epitope S793–812(N) had a more inhibitory effect than S793–812 on the G614 and D614 pseudoviruses, suggesting that glycosylation on the epitope might affect viral infectivity. Two conserved epitopes (S793–812(N) and S909–923) near the highly conserved S2' protease cleavage site of the S protein also induced neutralizing antibodies on the D614 and G614 pseudoviruses, indicating that there may be mechanism that blocks cell entry of SARS-CoV-2. Notably, several identified neutralizing epitopes are consistent with the epitopes of some important neutralizing antibodies, such as S139–153 to antibody 4A8 (PDB: 7C2L), S406–420 to antibody C105 (PDB: 6XCN), and S16–30 to antibody P2B-2F6 (PDB: 7BWJ) (Barnes et al., 2020; Chi et al., 2020; Ju et al., 2020), suggesting that these epitopes might be the antibody-targeting sites. Importantly, a shift of the immunodominant and neutralizing epitope region from S556–S570 to S675–689 was observed upon D614G mutation. S675–689 is at the S1/S2 cleavage site located at the interface

### Figure 3. Antibodies induced by epitopes of the S protein inhibit SARS-CoV-2 pseudovirus infection

(A and B) Neutralizing potency of mice sera after the third immunization with each vaccine was measured with D614 (A) or G614 (B) SARS-CoV-2 pseudoviruses (PsVs). Data are shown as mean  $\pm$  SEM (compared with the Hbc-S control; \* $p < 0.05$ ; \*\* $p < 0.01$ ; \*\*\* $p < 0.001$ ; \*\*\*\* $p < 0.0001$ ; compared with non-glycosylated epitope; # $p < 0.05$ ; ## $p < 0.01$ ; ### $p < 0.0001$ ).

(C) 2-Fold serial dilution neutralizing assay against G614 SARS-CoV-2 pseudoviruses. Data are shown as mean  $\pm$  SEM.

(D–I) Spatial positions of D614 (D–F) and G614 pseudovirus (G–I) neutralizing epitopes (colored), respectively, in or near the N-terminal domain (NTD; D and G), receptor-binding domain (RBD; E and H), and S2' cleavage site (F and I) of the S protein (gray).



of the S1 and S2 subunits of the S protein, which is important for S protein-mediated virus-cell membrane fusion. Our results suggested that the S675–689 epitope was at the vulnerability site of SARS-CoV-2 and might be an ideal candidate and targeting site for vaccine development. Moreover, our results showed that the neutralizing epitopes are highly spatially clustered, indicating that conformational epitopes in the above regions may be used for designing an effective vaccine.

In conclusion, we successfully predicted SARS-CoV-2 epitopes based on the 3D structures of the S, M, N, and E proteins; validated their immunogenicity; characterized the homology of the epitopes among betacoronaviruses; and identified the neutralizing and immunodominant epitopes (Table S3). Our findings provide a wide neutralizing and immunodominant epitope spectrum for design of an effective and safe vaccine, differential diagnosis, and virus classification.

## STAR★METHODS

Detailed methods are provided in the online version of this paper and include the following:

- **KEY RESOURCES TABLE**
- **RESOURCE AVAILABILITY**
  - Lead contact
  - Materials availability
  - Data and code availability
- **EXPERIMENTAL MODEL AND SUBJECT DETAILS**
  - Specimens from SARS-CoV-2 patients
  - Mice
- **METHOD DETAILS**
  - Epitope prediction
  - Preparation and characterization of HBc-S-peptide VLP vaccine
  - Mice immunization
  - Enzyme-linked immunosorbent assay (ELISA)
  - SARS-CoV-2 pseudovirus neutralization assay
- **QUANTIFICATION AND STATISTICAL ANALYSIS**

## SUPPLEMENTAL INFORMATION

Supplemental Information can be found online at <https://doi.org/10.1016/j.celrep.2020.108666>.

## ACKNOWLEDGMENTS

This work was supported by grants from the National Natural Science Foundation of China (81971610, 81971073, and 81903531); the National Science and Technology Major Projects of New Drugs (2018ZX09733001-001-008); the Innovation Academy for Green Manufacture, Chinese Academy of Sciences (IAGM2020C29); and the Zhejiang University Special Scientific Research Fund for COVID-19 Prevention and Control (2020XGZX075).

## AUTHOR CONTRIBUTIONS

R.-t.L. designed experiments and wrote the manuscript. S.L. and X.-x.X. designed experiments, performed research, analyzed data, and wrote the manuscript. C.-g.J. designed experiments. L.Z. (Lei Zhao), Y.-l.W., J.X., H.-x.G., and X.-h.S. collected blood samples and carried out experiments. B.W., J.Z., T.-r.Y., M.J., C.-p.L., D.-q.L., L.Z. (Lun Zhang), S.-j.H., X.-l.Y., G.-w.Y., X.-m.F., C.-w.K., and B.-x.K. performed research.

## DECLARATION OF INTERESTS

R.-t.L., S.L., and X.-x.X. have filed a provisional patent on epitopes for designing a coronavirus vaccine.

Received: June 9, 2020

Revised: November 26, 2020

Accepted: December 28, 2020

Published: January 26, 2021

## REFERENCES

- Ahmed, S.F., Quadeer, A.A., and McKay, M.R. (2020). Preliminary Identification of Potential Vaccine Targets for the COVID-19 Coronavirus (SARS-CoV-2) Based on SARS-CoV Immunological Studies. *Viruses* 12, 254.
- Alphs, H.H., Gambhira, R., Karanam, B., Roberts, J.N., Jagu, S., Schiller, J.T., Zeng, W., Jackson, D.C., and Roden, R.B. (2008). Protection against heterologous human papillomavirus challenge by a synthetic lipopeptide vaccine containing a broadly cross-neutralizing epitope of L2. *Proc. Natl. Acad. Sci. USA* 105, 5850–5855.
- Barnes, C.O., Gristick, H.B., Freund, N.T., Escolano, A., Lyubimov, A.Y., Hartweiger, H., West, A.P., Jr., Cohen, A.E., Nussenzweig, M.C., and Bjorkman, P.J. (2018). Structural characterization of a highly-potent V3-glycan broadly neutralizing antibody bound to natively-glycosylated HIV-1 envelope. *Nat. Commun.* 9, 1251.
- Barnes, C.O., West, A.P., Jr., Huey-Tubman, K.E., Hoffmann, M.A.G., Sharaf, N.G., Hoffman, P.R., Koranda, N., Gristick, H.B., Gaebler, C., Muecksch, F., et al. (2020). Structures of Human Antibodies Bound to SARS-CoV-2 Spike Reveal Common Epitopes and Recurrent Features of Antibodies. *Cell* 182, 828–842.e16.
- Baruah, V., and Bose, S. (2020). Immunoinformatics-aided identification of T cell and B cell epitopes in the surface glycoprotein of 2019-nCoV. *J. Med. Virol.* 92, 495–500.
- Becerra-Flores, M., and Cardozo, T. (2020). SARS-CoV-2 viral spike G614 mutation exhibits higher case fatality rate. *Int. J. Clin. Pract.* 74, e13525.
- Bhattacharya, M., Sharma, A.R., Patra, P., Ghosh, P., Sharma, G., Patra, B.C., Lee, S.S., and Chakraborty, C. (2020). Development of epitope-based peptide vaccine against novel coronavirus 2019 (SARS-COV-2): Immunoinformatics approach. *J. Med. Virol.* 92, 618–631.
- Chen, W.H., Strych, U., Hotez, P.J., and Bottazzi, M.E. (2020a). The SARS-CoV-2 Vaccine Pipeline: an Overview. *Curr. Trop. Med. Rep.*, 1–4.
- Chen, Y., Liu, Q., and Guo, D. (2020b). Emerging coronaviruses: Genome structure, replication, and pathogenesis. *J. Med. Virol.* 92, 418–423.
- Chi, X., Yan, R., Zhang, J., Zhang, G., Zhang, Y., Hao, M., Zhang, Z., Fan, P., Dong, Y., Yang, Y., et al. (2020). A neutralizing human antibody binds to the N-terminal domain of the Spike protein of SARS-CoV-2. *Science* 369, 650–655.
- Dai, W., Zhang, B., Jiang, X.M., Su, H., Li, J., Zhao, Y., Xie, X., Jin, Z., Peng, J., Liu, F., et al. (2020). Structure-based design of antiviral drug candidates targeting the SARS-CoV-2 main protease. *Science* 368, 1331–1335.
- Grifoni, A., Sidney, J., Zhang, Y., Scheuermann, R.H., Peters, B., and Sette, A. (2020). A Sequence Homology and Bioinformatic Approach Can Predict Candidate Targets for Immune Responses to SARS-CoV-2. *Cell Host Microbe* 27, 671–680.e2.
- Guo, J.P., Petric, M., Campbell, W., and McGeer, P.L. (2004). SARS corona virus peptides recognized by antibodies in the sera of convalescent cases. *Virology* 324, 251–256.
- Jespersen, M.C., Peters, B., Nielsen, M., and Marcatili, P. (2017). BepiPred-2.0: improving sequence-based B-cell epitope prediction using conformational epitopes. *Nucleic Acids Res.* 45 (W1), W24–W29.
- Ji, M., Xie, X.X., Liu, D.Q., Lu, S., Zhang, L.X., Huang, Y.R., and Liu, R.T. (2020). Engineered hepatitis B core virus-like particle carrier for precise and personalized Alzheimer's disease vaccine preparation via fixed-point coupling. *Applied Materials Today* 19, 100575.

- Jin, Z., Du, X., Xu, Y., Deng, Y., Liu, M., Zhao, Y., Zhang, B., Li, X., Zhang, L., Peng, C., et al. (2020). Structure of M<sup>Pro</sup> from SARS-CoV-2 and discovery of its inhibitors. *Nature* 582, 289–293.
- Ju, B., Zhang, Q., Ge, J., Wang, R., Sun, J., Ge, X., Yu, J., Shan, S., Zhou, B., Song, S., et al. (2020). Human neutralizing antibodies elicited by SARS-CoV-2 infection. *Nature* 584, 115–119.
- Kiyotani, K., Toyoshima, Y., Nemoto, K., and Nakamura, Y. (2020). Bioinformatic prediction of potential T cell epitopes for SARS-Cov-2. *J. Hum. Genet.* 65, 569–575.
- Kong, R., Duan, H., Sheng, Z., Xu, K., Acharya, P., Chen, X., Cheng, C., Dingens, A.S., Gorman, J., Sastry, M., et al.; NISC Comparative Sequencing Program (2019). Antibody Lineages with Vaccine-Induced Antigen-Binding Hotspots Develop Broad HIV Neutralization. *Cell* 178, 567–584.e19.
- Korber, B., Fischer, W.M., Gnanakaran, S., Yoon, H., Theiler, J., Abfalterer, W., Hengartner, N., Giorgi, E.E., Bhattacharya, T., Foley, B., et al.; Sheffield COVID-19 Genomics Group (2020). Tracking Changes in SARS-CoV-2 Spike: Evidence that D614G Increases Infectivity of the COVID-19 Virus. *Cell* 182, 812–827.e19.
- Kringelum, J.V., Lundegaard, C., Lund, O., and Nielsen, M. (2012). Reliable B cell epitope predictions: impacts of method development and improved benchmarking. *PLoS Comput. Biol.* 8, e1002829.
- Lan, J., Ge, J., Yu, J., Shan, S., Zhou, H., Fan, S., Zhang, Q., Shi, X., Wang, Q., Zhang, L., and Wang, X. (2020). Structure of the SARS-CoV-2 spike receptor-binding domain bound to the ACE2 receptor. *Nature* 581, 215–220.
- Li, X., Wang, W., Zhao, X., Zai, J., Zhao, Q., Li, Y., and Chaillon, A. (2020). Transmission dynamics and evolutionary history of 2019-nCoV. *J. Med. Virol.* 92, 501–511.
- Lu, R., Zhao, X., Li, J., Niu, P., Yang, B., Wu, H., Wang, W., Song, H., Huang, B., Zhu, N., et al. (2020). Genomic characterisation and epidemiology of 2019 novel coronavirus: implications for virus origins and receptor binding. *Lancet* 395, 565–574.
- Ni, L., Ye, F., Cheng, M.L., Feng, Y., Deng, Y.Q., Zhao, H., Wei, P., Ge, J., Gou, M., Li, X., et al. (2020). Detection of SARS-CoV-2-Specific Humoral and Cellular Immunity in COVID-19 Convalescent Individuals. *Immunity* 52, 971–977.e3.
- Poh, C.M., Carissimo, G., Wang, B., Amrun, S.N., Lee, C.Y.-P., Chee, R.S.-L., Yeo, N.K.-W., Lee, W.-H., Leo, Y.-S., Chen, M.I.C., et al. (2020). Potent neutralizing antibodies in the sera of convalescent COVID-19 patients are directed against conserved linear epitopes on the SARS-CoV-2 spike protein. *bioRxiv*. <https://doi.org/10.1101/2020.2003.2030.015461>.
- Seydoux, E., Homad, L.J., MacCamy, A.J., Parks, K.R., Hurlburt, N.K., Jennewein, M.F., Akins, N.R., Stuart, A.B., Wan, Y.H., Feng, J., et al. (2020). Analysis of a SARS-CoV-2-Infected Individual Reveals Development of Potent Neutralizing Antibodies with Limited Somatic Mutation. *Immunity* 53, 98–105.e5.
- Shang, J., Ye, G., Shi, K., Wan, Y., Luo, C., Aihara, H., Geng, Q., Auerbach, A., and Li, F. (2020). Structural basis of receptor recognition by SARS-CoV-2. *Nature* 581, 221–224.
- Shichijo, S., Keicho, N., Long, H.T., Quy, T., Phi, N.C., Ha, L.D., Ban, V.V., Itoyama, S., Hu, C.J., Komatsu, N., et al. (2004). Assessment of synthetic peptides of severe acute respiratory syndrome coronavirus recognized by long-lasting immunity. *Tissue Antigens* 64, 600–607.
- Sok, D., and Burton, D.R. (2018). Recent progress in broadly neutralizing antibodies to HIV. *Nat. Immunol.* 19, 1179–1188.
- Thanh Le, T., Andreadakis, Z., Kumar, A., Gómez Román, R., Tollefsen, S., Sa-ville, M., and Mayhew, S. (2020). The COVID-19 vaccine development landscape. *Nat. Rev. Drug Discov.* 19, 305–306.
- Thompson, J.D., Higgins, D.G., and Gibson, T.J. (1994). CLUSTAL W: improving the sensitivity of progressive multiple sequence alignment through sequence weighting, position-specific gap penalties and weight matrix choice. *Nucleic Acids Res.* 22, 4673–4680.
- van Doremalen, N., Lambe, T., Spencer, A., Belij-Rammerstorfer, S., Purushotham, J.N., Port, J.R., Avanzato, V., Bushmaker, T., Flaxman, A., Ulaszewska, M., et al. (2020). ChAdOx1 nCoV-19 vaccination prevents SARS-CoV-2 pneumonia in rhesus macaques. *bioRxiv*. <https://doi.org/10.1101/2020.2005.2013.093195>.
- Walls, A.C., Park, Y.J., Tortorici, M.A., Wall, A., McGuire, A.T., and Veesler, D. (2020). Structure, Function, and Antigenicity of the SARS-CoV-2 Spike Glycoprotein. *Cell* 181, 281–292.e6.
- Wang, C., Li, W., Drabek, D., Okba, N.M.A., van Haperen, R., Osterhaus, A.D.M.E., van Kuppeveld, F.J.M., Haagmans, B.L., Grosveld, F., and Bosch, B.J. (2020). A human monoclonal antibody blocking SARS-CoV-2 infection. *Nat. Commun.* 11, 2251.
- Watanabe, Y., Allen, J.D., Wrapp, D., McLellan, J.S., and Crispin, M. (2020). Site-specific glycan analysis of the SARS-CoV-2 spike. *Science* 369, 330–333.
- Waterhouse, A., Bertoni, M., Bienert, S., Studer, G., Tauriello, G., Gumienny, R., Heer, F.T., de Beer, T.A.P., Rempfer, C., Bordoli, L., et al. (2018). SWISS-MODEL: homology modelling of protein structures and complexes. *Nucleic Acids Res.* 46 (W1), W296–W303.
- Wrapp, D., Wang, N., Corbett, K.S., Goldsmith, J.A., Hsieh, C.L., Abiona, O., Graham, B.S., and McLellan, J.S. (2020). Cryo-EM structure of the 2019-nCoV spike in the prefusion conformation. *Science* 367, 1260–1263.
- Xu, K., Acharya, P., Kong, R., Cheng, C., Chuang, G.Y., Liu, K., Louder, M.K., O’Dell, S., Rawi, R., Sastry, M., et al. (2018). Epitope-based vaccine design yields fusion peptide-directed antibodies that neutralize diverse strains of HIV-1. *Nat. Med.* 24, 857–867.
- Yan, R., Zhang, Y., Li, Y., Xia, L., Guo, Y., and Zhou, Q. (2020). Structural basis for the recognition of SARS-CoV-2 by full-length human ACE2. *Science* 367, 1444–1448.
- Yang, H., Xie, W., Xue, X., Yang, K., Ma, J., Liang, W., Zhao, Q., Zhou, Z., Pei, D., Ziebuhr, J., et al. (2005). Design of wide-spectrum inhibitors targeting coronavirus main proteases. *PLoS Biol.* 3, e324.
- Yuan, M., Wu, N.C., Zhu, X., Lee, C.D., So, R.T.Y., Lv, H., Mok, C.K.P., and Wilson, I.A. (2020). A highly conserved cryptic epitope in the receptor binding domains of SARS-CoV-2 and SARS-CoV. *Science* 368, 630–633.
- Zhang, B.-z., Hu, Y.-f., Chen, L.-l., Tong, Y.-g., Hu, J.-c., Cai, J.-p., Chan, K.-H., Dou, Y., Deng, J., Gong, H.-r., et al. (2020). Mapping the Immunodominance Landscape of SARS-CoV-2 Spike Protein for the Design of Vaccines against COVID-19. *bioRxiv*, 2020.2004.2023.056853.
- Zhou, P., Yang, X.L., Wang, X.G., Hu, B., Zhang, L., Zhang, W., Si, H.R., Zhu, Y., Li, B., Huang, C.L., et al. (2020). A pneumonia outbreak associated with a new coronavirus of probable bat origin. *Nature* 579, 270–273.

## STAR★METHODS

### KEY RESOURCES TABLE

| REAGENT or RESOURCE                                  | SOURCE                                               | IDENTIFIER                                                                                          |
|------------------------------------------------------|------------------------------------------------------|-----------------------------------------------------------------------------------------------------|
| <b>Antibodies</b>                                    |                                                      |                                                                                                     |
| HRP-conjugated goat anti-mouse IgG                   | Abcam                                                | Cat#ab6789; RRID: AB_955439                                                                         |
| HRP-conjugated goat anti-human IgG                   | Abcam                                                | Cat#ab6858; RRID: AB_955433                                                                         |
| <b>Chemicals, peptides, and recombinant proteins</b> |                                                      |                                                                                                     |
| BSA                                                  | Sigma-Aldrich Corporation                            | Cat#V900933                                                                                         |
| Epitope peptides                                     | GL Biochem                                           | N/A                                                                                                 |
| HBc-S                                                | Ji et.al., 2020                                      | N/A                                                                                                 |
| Imject Alum Adjuvant                                 | Thermo Fisher                                        | Cat#77161                                                                                           |
| D614 SARS-CoV-2 pseudoviruses                        | PackGene Biotech                                     | Cat#LV-nCov1                                                                                        |
| G614 SARS-CoV-2 pseudoviruses                        | PackGene Biotech                                     | Cat#LV-nCov1                                                                                        |
| chromogenic substrate TMB                            | Thermo Fisher                                        | Cat#34028                                                                                           |
| SARS-CoV-2 Spike S1+S2                               | Sino Biological Inc.                                 | Cat#40589-V08B1                                                                                     |
| SARS-CoV-2 nucleocapsid                              | Sino Biological Inc.                                 | Cat#40588-V08B                                                                                      |
| <b>Critical commercial assays</b>                    |                                                      |                                                                                                     |
| Bright-Glo™ Luciferase Assay System                  | Promega                                              | Cat#E2620                                                                                           |
| SARS-CoV-2 Nucleic Acid Extraction Kit               | Daan Gene                                            | Cat#DA0931                                                                                          |
| <b>Deposited data</b>                                |                                                      |                                                                                                     |
| Sequence data                                        | This paper                                           | GenBank: MW362746-MW362764, MW368449-MW368461                                                       |
| <b>Experimental models: cell lines</b>               |                                                      |                                                                                                     |
| ACE2-239T cells                                      | PackGene Biotech                                     | Cat#nCov-3                                                                                          |
| <b>Experimental models: organisms/strains</b>        |                                                      |                                                                                                     |
| C57BL/6                                              | Beijing HFK Bioscience CO., LTD                      | N/A                                                                                                 |
| <b>Software and algorithms</b>                       |                                                      |                                                                                                     |
| Gromacs v5.1                                         | GROMACS                                              | <a href="http://www.gromacs.org/">http://www.gromacs.org/</a>                                       |
| Discotope 2.0                                        | Immune epitope database and analysis resource (IEDB) | <a href="http://tools.iedb.org/discotope/">http://tools.iedb.org/discotope/</a>                     |
| ClustalW2                                            | EMBL's European Bioinformatics Institute (EMBL-EBI)  | <a href="https://www.ebi.ac.uk/Tools/msa/clustalw2/">https://www.ebi.ac.uk/Tools/msa/clustalw2/</a> |
| GraphPad Prism 7.0a                                  | GraphPad Software                                    | N/A                                                                                                 |

### RESOURCE AVAILABILITY

#### Lead contact

Further information and requests for resources and reagents should be directed to and will be fulfilled by the Lead Contact, Rui-tian Liu ([rtliu@ipe.ac.cn](mailto:rtliu@ipe.ac.cn)).

#### Materials availability

This study did not generate new unique reagents.

#### Data and code availability

This study did not generate any unique code. The sequence data of S and N gene of SARS-CoV-2 from COVID 19 patients is available at NCBI GenBank repository. The accession numbers for the S and N gene sequencing reported in this paper are GenBank: MW368449-MW368461 and GenBank: MW362746-MW362764.

## EXPERIMENTAL MODEL AND SUBJECT DETAILS

### Specimens from SARS-CoV-2 patients

Serum samples were collected from 20 early convalescent patients with COVID-19 which were confirmed by SARS-CoV-2 real-time reverse transcriptase–polymerase chain reaction (RT-PCR). 12 patients were infected in China and the other eight were imported cases from Europe. The median age of imported and domestic patients was 50.8 years (range, 10–72 years) and 30.6 years (range, 17–50 years), respectively. Patient information including age and sex was shown in Table 1. Biological samples from patients were randomly and blindly selected with no considerations for age or sex. This study was approved by the Institutional Review Board of the Shijiazhuang Fifth Hospital. Waiver of informed consent for collection of samples from infected individuals was granted by the institutional ethics committee. Nucleic acids from throat swab samples were extracted using SARS-CoV-2 Nucleic Acids Extraction Kit (Daan Gene, Zhongshan, China) according to the manufacturer’s instructions. The genes of S and N were reverse transcribed, amplified, and sequenced.

### Mice

6–8 week-old BALB/c female mice were obtained from Beijing HFK Bioscience CO., LTD (Beijing, China) and maintained with access to food and water *ad libitum* in a colony room kept at  $22 \pm 2^\circ\text{C}$  and  $50 \pm 5\%$  humidity, under a 12:12 light/dark cycle. All animal experiments were performed in accordance with the China Public Health Service Guide for the Care and Use of Laboratory Animals. Experiments involving mice and protocols were approved by the Institutional Animal Care and Use Committee of Tsinghua University (AP#15-LRT1).

## METHOD DETAILS

### Epitope prediction

Homologous modeling and molecular dynamics simulation was used to predict the structure of S, M, N, E protein. The genome sequence of SARS-CoV-2 isolate Wuhan-Hu-1 was retrieved from the NCBI database under the accession number MN988669.1 and the protein sequences were acquired according to the annotation. The original pdb file of the S, M, N, E protein was established by homologous modeling using SWISS-MODEL (Waterhouse et al., 2018) according to the template structures of SARS-CoV spike glycoprotein (PDB: 6ACC), SARS-CoV main peptidase M(pro) (PDB: 2A5K), SARS-CoV envelope small membrane protein (PDB: 5X29) and SARS-CoV nucleocapsid protein (PDB: 1SSK), respectively. On the basis of the homologous modeled pdb file, added water, adjusted pH of chloride and sodium ions and ran molecular dynamics simulation program, obtaining the pdb file in the human body temperature (310K) state. We then calculated the full atomic structure of the protein for 1  $\mu\text{s}$  using the molecular dynamics software GROMACS 5.1 on Sunway TaihuLight supercomputer and obtained the molecular orbital energy level and spatial structure information of the protein. In particular, the RBD region was referred to as the fragment from 347 to 520 amino acid of S protein. Structure-based conformational B cell epitope prediction was performed by using Discotope 2.0 (Kringelum et al., 2012) and  $-2.5$  was used as a positivity cutoff. All the appropriate linear epitope windows were then selected by the following criteria: 1) solvate accessible regions with high surface probability; 2) regions with high antigenicity and flexibility; 3) the key functional residues of conformational B cell epitopes were centralized and with high degree of continuity in the window. The selected epitopes were then applied to homology analysis with the according sequences from SARS-CoV and RaTG13 via ClustalW (Thompson et al., 1994). N-glycosylated regions with homology  $>50\%$  were selected for synthesis of N-glycosylated epitopes. Epitope homology was calculated by the following formula:

$$\text{Epitope homology} = \frac{\text{Number of identical amino acids} + \text{Number of conservation substitution amino acids}}{\text{Total Number of amino acids of epitope}} \times 100\%$$

### Preparation and characterization of HBc-S-peptide VLP vaccine

HBc-S was purified as described previously (Ji et al., 2020). Purified protein was concentrated and determined by BCA protein assay kit (Pierce, Rockford, IL, USA). The purity of the recombinant protein was analyzed by SDS-PAGE. The peptides of SpyTag-epitope were chemically synthesized by GL Biochem (Shanghai, China). For the preparation of epitope conjugated HBc-S VLP vaccine, HBc-S VLPs were incubated with 3-fold molar excess of epitope peptide for 3 h at room temperature in citrate reaction buffer (40 mM  $\text{Na}_2\text{HPO}_4$ , 200 mM sodium citrate, pH 6.2), and was then dialyzed with 100 kDa cut-off membrane to remove the unreacted epitope peptide.

Transmission electron microscopy (TEM) was used for the morphological examination of HBc-S-peptide VLP vaccine. 20  $\mu\text{L}$  VLPs (0.1–0.3 mg/ml) were applied to 200 mesh copper grids for 5 min and negatively stained with 2% uranyl acetate for 1 min, and then blotted with filter paper and air-dried. VLPs were imaged in a Hitachi TEM system at 80 kV at 40,000 x magnification. To measure the hydrodynamic size of HBc-S-peptide VLP vaccine using dynamic light scattering (DLS), 9  $\mu\text{L}$  of HBc-S or HBc-S-P VLPs at concentration of 0.1 mg/mL was loaded into a Uni tube and held at 2 min at room temperature. Each measurement was taken four times with 5 DLS acquisitions by an all-in-one stability platform Uncle (Unchained lab, USA).



### **Mice immunization**

To evaluate the immunogenicity of the epitopes, female BALB/c mice (6-8 weeks) were subcutaneously vaccinated with Hbc-S-P VLPs (containing 100  $\mu$ g Hbc-S) in citrate buffer (200 mM citrate acid, 40 mM  $\text{NaH}_2\text{PO}_4$ , pH 6.2, 100  $\mu$ l) mixed with Alum (1:3 v/v) (ThermoFisher, Waltham, MA, USA). Hbc-S was used as a control. Each group of mice ( $n = 5$ ) received their first injection at day 0 and boosters at day 14 and 28. Serum samples were taken 10 days after each immunization.

### **Enzyme-linked immunosorbent assay (ELISA)**

Serum antibodies specific for epitope peptides and SARS-CoV-2 proteins were detected by ELISA. 96-well plates (Dynex Technologies, Chantilly, VA) were coated with 0.5  $\mu$ g peptides, 100 ng S or N protein per well at 4°C overnight, respectively, and then washed three times with PBS and blocked with 3% BSA (in 0.1% PBST) for 2 h at 37°C. After blocking, the plates were incubated with serial dilutions of the sera (100  $\mu$ l/well, in two-fold dilution) for 2 h at 37°C. The bound serum antibodies were detected with HRP-conjugated goat anti-mouse IgG and chromogenic substrate TMB (ThermoFisher, Waltham, MA, USA). The cut-off for seropositivity was set as the mean value plus three standard deviations (3SD) in Hbc-S control sera. The binding of the epitopes to the sera of COVID-19 infected patients were detected by ELISA using the same procedure as described above, 96-well plates were coated with 0.5  $\mu$ g peptides and sera were diluted at 1:50. The cut-off lines were based on the mean value + 3SD in 4-5 healthy persons. All ELISA studies were performed at least twice.

### **SARS-CoV-2 pseudovirus neutralization assay**

Pooled mice sera collected at day 10 after the third immunization were diluted in DMEM supplemented with 10% fetal bovine serum, mixed with SARS-CoV-2 pseudoviruses (31600 TCID<sub>50</sub> per well) and incubated at 37°C for 1 h. The mixture was then added to  $1.5 \times 10^4$  ACE2-293T cells and the medium was replaced after 6 h. Firefly luciferase activity was measured 72 h post-infection using Bright-Glo Luciferase Assay System (Promega). All neutralization studies were performed at least twice. Three independently mixed replicates were measured for each experiment.

### **QUANTIFICATION AND STATISTICAL ANALYSIS**

The data presented in this study were expressed as mean  $\pm$  SEM. Data were analyzed by one-way (ANOVA), followed by multiple comparisons using Dunnett's test within GraphPad Prism 7.0 software. Student's t test was used to analyze the data of non-glycosylated and glycosylated epitopes.  $p < 0.05$  was considered to be significant.

## Supplemental Information

### The immunodominant and neutralization

### linear epitopes for SARS-CoV-2

Shuai Lu, Xi-xiu Xie, Lei Zhao, Bin Wang, Jie Zhu, Ting-rui Yang, Guang-wen Yang, Mei Ji, Cui-ping Lv, Jian Xue, Er-wei Dai, Xi-ming Fu, Dong-qun Liu, Lun Zhang, Sheng-jie Hou, Xiao-lin Yu, Yu-ling Wang, Hui-xia Gao, Xue-han Shi, Chang-wen Ke, Bi-xia Ke, Chun-guo Jiang, and Rui-tian Liu

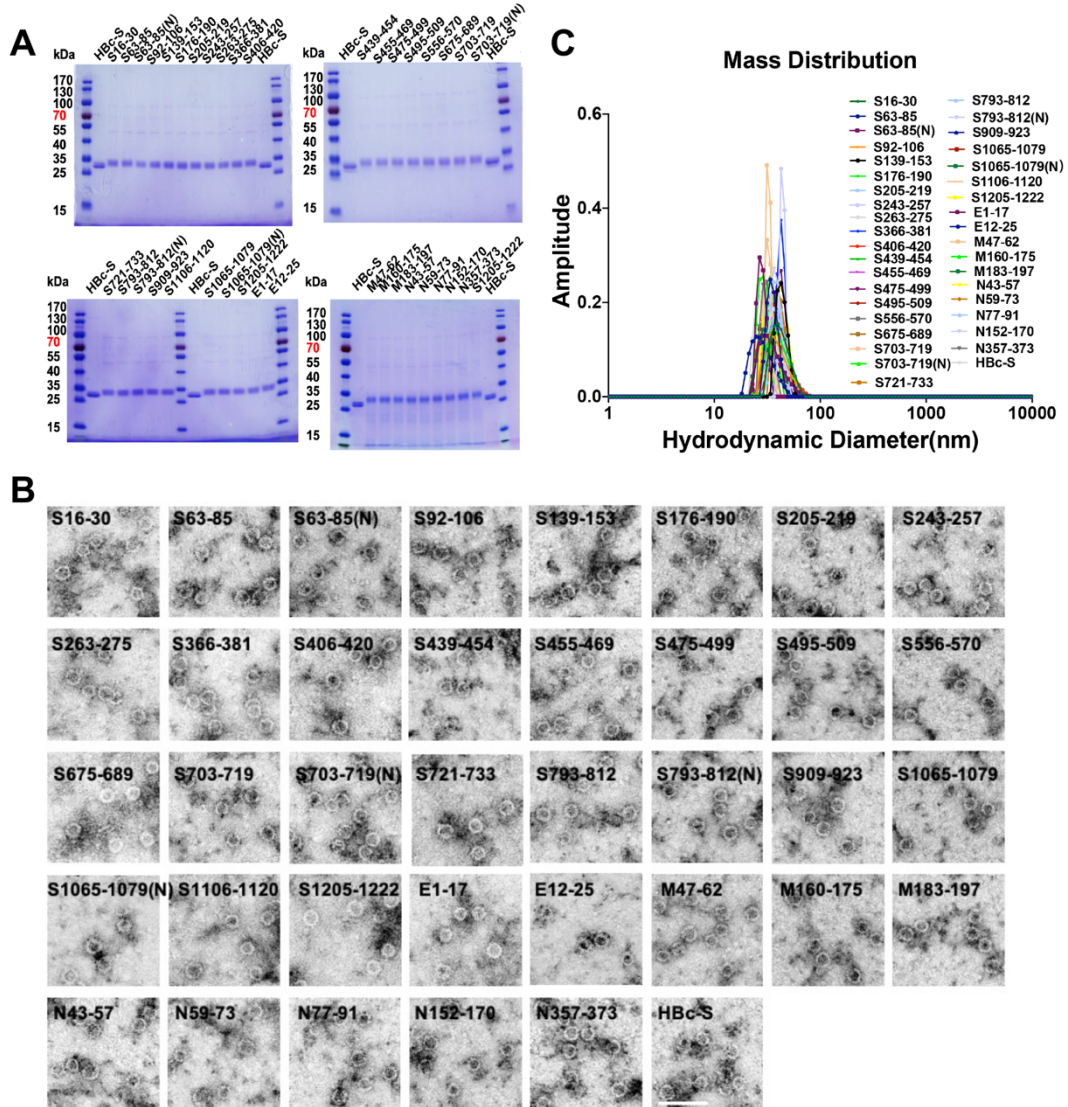

**Figure S1. Preparation of HBC-S VLPs displayed with the epitopes.** Related to Figure 1. (A) SDS-PAGE analysis of the conjugation of HBC-S with epitope peptides. (B) The morphology of HBC-S-P VLPs. HBC-S-P VLPs were imaged by Hitachi TEM at 80 KV at 40,000 $\times$  magnification, the scale bar is 200 nm. (C) The representative hydrodynamic diameter of HBC-S-P VLPs.

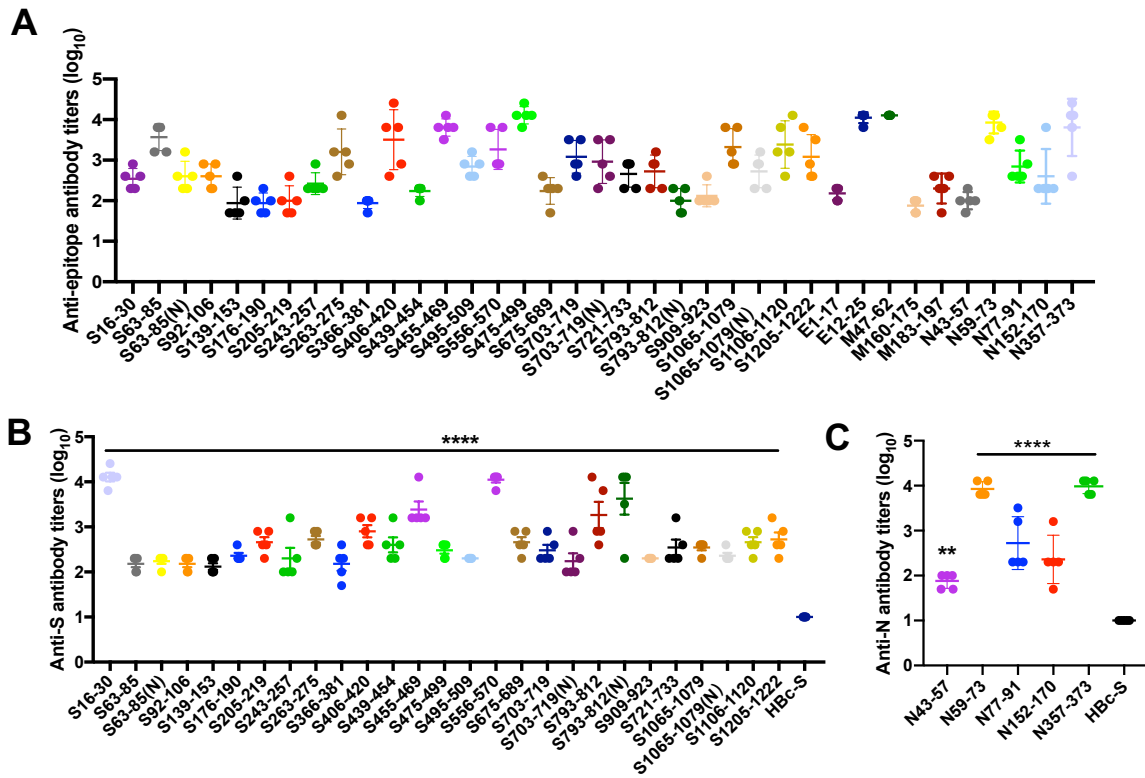

**Figure S2. Epitope conjugated on HBC-S VLPs induced high antibody titers against epitope peptides and S, N proteins at 10 days after the second immunization. Related to Figure 1.**



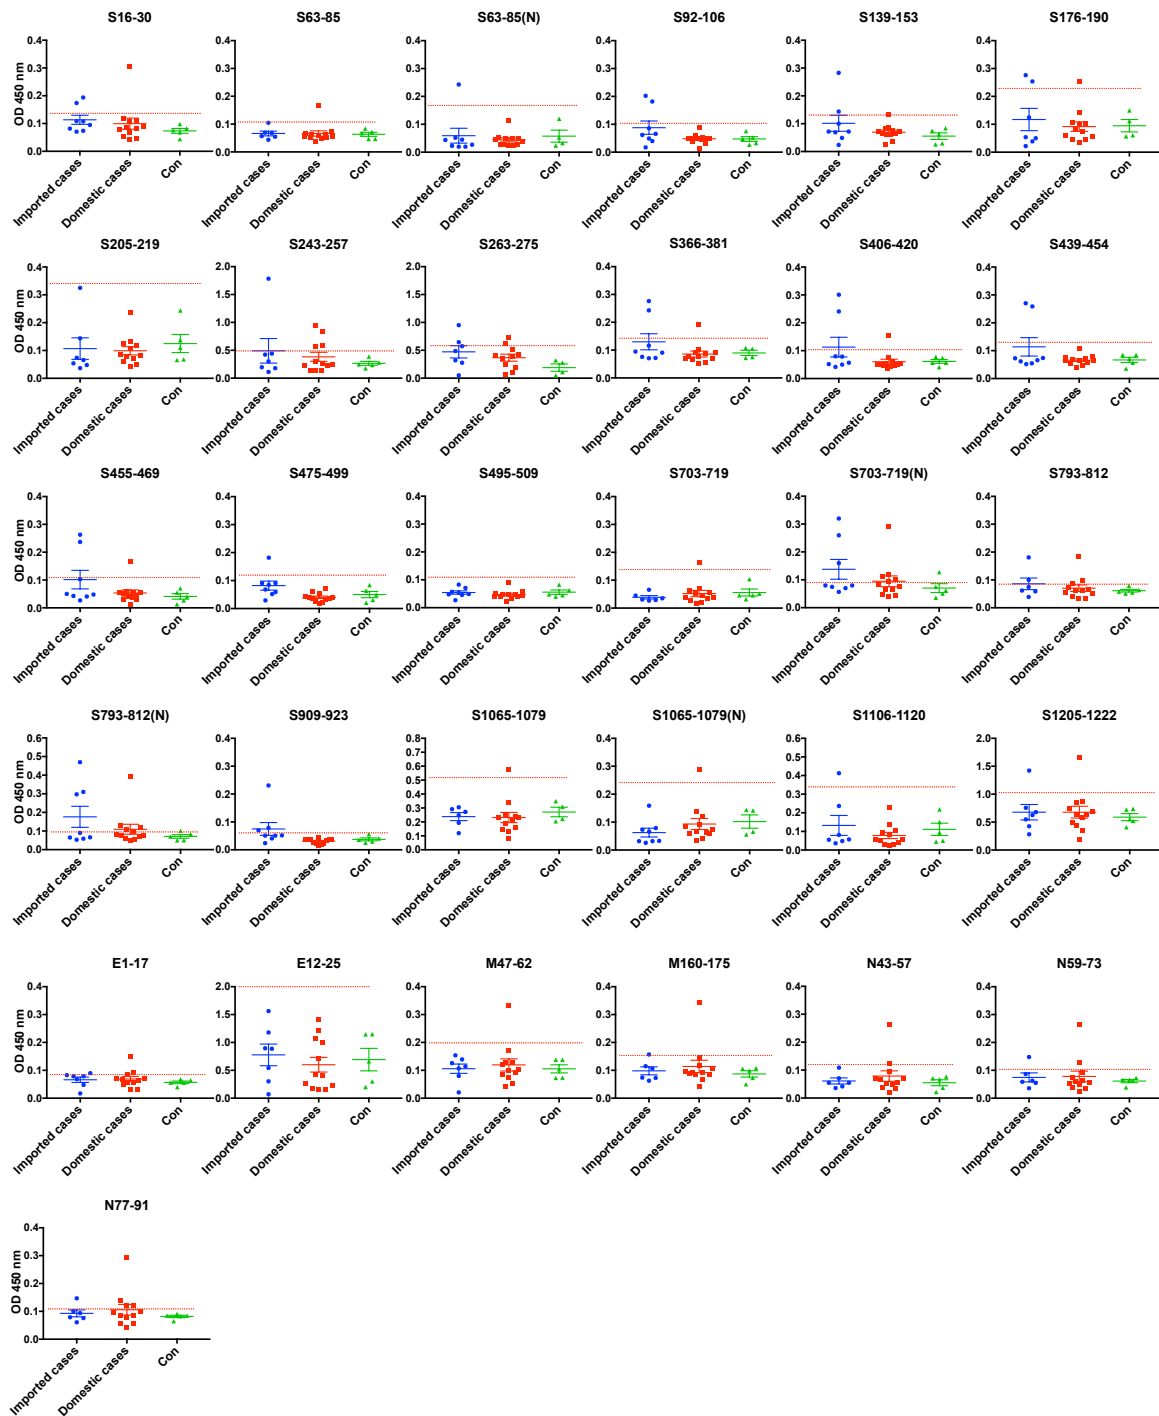

**Figure S3. The non-immunodominant epitopes against S, E, M, N in early convalescent sera from COVID-19 patients. Related to Figure 2.**

**Table S1. Predicted epitope peptides.** Related to Figure 1.

| Location      | Sequence                        | Homology |
|---------------|---------------------------------|----------|
| S16-30        | VNLTTTRTQLPPAYTN                | 33.30%   |
| S63-85        | TWFHAIHVSGTNGTKRFDNPVLP         | 60.90%   |
| S63-85(N)     | TWFHAIHVSGTNGTKRFDN(GlcNAc)PVLP | 60.90%   |
| S92-106       | FASTEKSNIIRGWIF                 | 100%     |
| S139-153      | PFLGVYHKNKNSWM                  | 26.70%   |
| S176-190      | LMDLEGKQGNFKNLR                 | 73.30%   |
| S205-219      | SKHTPINLVRDLPQG                 | 73.30%   |
| S243-257      | ALHRSYLTPGDSSSG                 | 13.30%   |
| S263-275      | AAYYVGYLQPRTF                   | 92.30%   |
| S366-381      | SVLYNSASFSTFKCYG                | 93.70%   |
| S406-420      | EVRQIAPGQTGKIAD                 | 93.30%   |
| S439-454      | NNLDSKVGGNYNLYR                 | 62.50%   |
| S455-469      | LFRKSNLKPFRDIS                  | 86.70%   |
| S475-499      | AGSTPCNGVEGFNCYFPLQSYGFQP       | 48%      |
| S495-509      | YGFQPTNGVGYQPYPYR               | 80%      |
| S556-570      | NKKFLPFQQFGRDIA                 | 86.70%   |
| S675-689      | QTQTNSPRRARSVAS                 | 40%      |
| S703-719      | NSVAYSNNIAIPTNFT                | 94.10%   |
| S703-719(N)   | NSVAYSNNIAIPTN(GlcNAc)FT        | 94.10%   |
| S721-733      | SVTTEILPVSMTK                   | 100%     |
| S793-812      | PIKDFGGFNFSQILPDPSKP            | 85%      |
| S793-812(N)   | PIKDFGGFN(GlcNAc)FSQILPDPSKP    | 85%      |
| S909-923      | IGVTQNVLYENQKLI                 | 93.30%   |
| S1065-1079    | VTYVPAQEKNFTTAP                 | 100%     |
| S1065-1079(N) | VTYVPAQEKN(GlcNAc)FTTAP         | 100%     |
| S1106-1120    | QRNFYEPQIITDNT                  | 93.30%   |
| S1205-1222    | KYEQYIKWPWYIWLGFIA              | 100%     |
| E1-17         | MYSFVSEETGTLIVNSV               | 100%     |
| E12-25        | LIVNSVLLFLAFVV                  | 100%     |
| M47-62        | YIIKLIFLWLLWPVTL                | 100%     |
| M160-175      | DIKDLPKEITVATSRT                | 100%     |
| M183-197      | ASQRVAGDSGFAAYS                 | 86.70%   |
| N43-57        | QGLPNNTASWFTALT                 | 100%     |
| N59-73        | HGKEDLKFPRGQGV                  | 100%     |
| N77-91        | NSSPDDQIGYRRAT                  | 93.30%   |
| N152-170      | ANNAIVLQLPQGTTLPKG              | 89.40%   |
| N357-373      | IDAYKTFPPTPEPKDKK               | 100%     |

**Table S2. The Hydrodynamic Diameter and PDI of HBC-S-P VLPs. Related to Figure 1.**

|                                  |                   |                 |                  |                 |                 |                    |                 |                 |                    |                 |                   |                      |                   |
|----------------------------------|-------------------|-----------------|------------------|-----------------|-----------------|--------------------|-----------------|-----------------|--------------------|-----------------|-------------------|----------------------|-------------------|
| <b>Sample</b>                    | <b>S16-30</b>     | <b>S63-85</b>   | <b>S63-85(N)</b> | <b>S92-106</b>  | <b>S139-153</b> | <b>S176-190</b>    | <b>S205-219</b> | <b>S243-257</b> | <b>S263-275</b>    | <b>S366-381</b> | <b>S406-420</b>   | <b>S439-454</b>      | <b>S455-469</b>   |
| <b>PDI</b>                       | 0.08              | 0.07            | 0.18             | 0.19            | 0.04            | 0.06               | 0.05            | 0.01            | 0.04               | 0.01            | 0.01              | 0.01                 | 0.06              |
| <b>Hydrodynamic Diameter(nm)</b> | 48.0±13.0         | 37.3±10.0       | 39.8±13.0        | 45.5±14.5       | 45.0±8.5        | 45.1±10.7          | 44.7±10.2       | 46.7±4.7        | 44.2±8.7           | 45.9±12.2       | 45.7±3.4          | 44.8±10.8            | 45.4±3.8          |
| <b>Sample</b>                    | <b>S475-499</b>   | <b>S495-509</b> | <b>S556-570</b>  | <b>S675-689</b> | <b>S703-719</b> | <b>S703-719(N)</b> | <b>S721-733</b> | <b>S793-812</b> | <b>S793-812(N)</b> | <b>S909-923</b> | <b>S1065-1079</b> | <b>S1065-1079(N)</b> | <b>S1106-1120</b> |
| <b>PDI</b>                       | 0.02              | 0.21            | 0.04             | 0.03            | 0.10            | 0.09               | 0.03            | 0.06            | 0.14               | 0.04            | 0.06              | 0.04                 | 0.06              |
| <b>Hydrodynamic Diameter(nm)</b> | 44.8±9.1          | 45.5±10.8       | 46.6±8.8         | 45.6±8.3        | 34.9±11.2       | 35.4±11.0          | 45.2±7.9        | 37.9±9.5        | 41.6±15.3          | 44.8±9.0        | 37.2±8.8          | 37.9±9.5             | 48.0±12.1         |
| <b>Sample</b>                    | <b>S1205-1222</b> | <b>E1-17</b>    | <b>E12-25</b>    | <b>M47-62</b>   | <b>M160-175</b> | <b>M183-197</b>    | <b>N43-57</b>   | <b>N59-73</b>   | <b>N77-91</b>      | <b>N152-170</b> | <b>N357-373</b>   | <b>HBC-S</b>         |                   |
| <b>PDI</b>                       | 0.06              | 0.12            | 0.08             | 0.15            | 0.01            | 0.02               | 0.10            | 0.14            | 0.01               | 0.04            | 0.04              | 0.06                 |                   |
| <b>Hydrodynamic Diameter(nm)</b> | 45.1±11.4         | 35.4±13.1       | 34.1±9.3         | 48.0±10.5       | 37.1±3.7        | 44.3±6.1           | 39.4±12.6       | 39.3±7.4        | 44.7±4.7           | 43.8±6.0        | 36.7±7.4          | 36.7±5.2             |                   |

**Table S3. Characteristics of epitopes.** Related to Figure 1-3.

| Epitopes                                                 | S protein                                                                                                                                       |                                         | N protein                                  | M protein                  | E protein      |
|----------------------------------------------------------|-------------------------------------------------------------------------------------------------------------------------------------------------|-----------------------------------------|--------------------------------------------|----------------------------|----------------|
|                                                          | non-glycosylation                                                                                                                               | Glycosylation                           |                                            |                            |                |
| Number                                                   | 23                                                                                                                                              | 4                                       | 5                                          | 3                          | 2              |
| Conserved<br>(>80% homology)                             | S92-106, S263-275, S366-381, S406-420, S455-469, S495-509, S556-570, S703-719, S721-733, S793-812, S909-923, S1065-1079, S1106-1120, S1205-1222 | S703-719(N), S793-812(N), S1065-1079(N) | N43-57, N59-73, N77-91, N152-170, N357-373 | M47-62, M160-175, M183-197 | E12-25, E55-69 |
| High immunogenicity<br>(antibody titer>10 <sup>4</sup> ) | S16-30, S205-219, S455-469, S475-499, S556-570, S721-733, S793-812, S1106-1120, S1205-1222                                                      | S793-812(N)                             | N59-73, N353-373                           | M47-62                     | E12-25         |
| Immunodominant                                           |                                                                                                                                                 |                                         |                                            |                            |                |
| Imported cases*                                          | S675-689, S721-733                                                                                                                              | None                                    | N152-170                                   | None                       | None           |
| Domestic cases*                                          | S556-570                                                                                                                                        | None                                    | N357-373, N152-170                         | M183-197                   | None           |
| Neutralizing                                             |                                                                                                                                                 |                                         |                                            |                            |                |
| D614 SARS-CoV-2                                          | S16-30, S92-106, S139-153, S243-275, S406-420, S439-454, S455-469, S475-499, S556-570, S909-923                                                 | S793-812(N)                             | NT <sup>a</sup>                            | NT                         | NT             |
| G614 SARS-CoV-2                                          | S63-85, S92-106, S139-153, S406-420, S439-454, S455-469, S475-499, S495-509, S675-689, S703-719, S793-812, S909-923, S1065-1079, S1106-1120     | S703-719(N), S793-812(N), S1065-1079(N) | NT                                         | NT                         | NT             |

\*Imported (Europe) cases infected SARS-CoV-2 in early April, 2020 and domestic (China) cases in early February, 2020

<sup>a</sup>NT represents not tested





SARS-CoV YGECLELDINARDLICAQKFNGLTVLPPLLTDDMIAAYTAALVSGTATAGWTFGAGAAALQI  
SARS-CoV-2 YGDCLGDIARDLICAQKFNGLTVLPPLLTDEMIAQYTSALLAGTITSGWTFGAGAAALQI  
RaTG13 YGDCLGDIARDLICAQKFNGLTVLPPLLTDEMIAQYTSALLAGTITSGWTFGAGAAALQI  
\*:\*\*\*\*\*:\*\*\*\*\*:\*\*\* \*\*:\*:\*:\*:\*:\*\*\*\*\*:\*\*\*\*\*

SARS-CoV PFAMQMAYRFNGLIGVTQNVLYENQKLI ANQFNKAI S IQESLTTTSTALGKLDVVNQNA  
SARS-CoV-2 PFAMQMAYRFNGLIGVTQNVLYENQKLI ANQFN SA I GKI QDSLSTASALGKLDVVNQNA  
RaTG13 PFAMQMAYRFNGLIGVTQNVLYENQKLI ANQFN SA I GKI QDSLSTASALGKLDVVNQNA  
\*\*\*\*\*:\*\*\*\*\*:\*\*\*:\*\*\*:\*\*\*:\*\*\*\*\*:\*\*\*\*\*

SARS-CoV QALNTLVKQLSSNFGAISSVLDNIDLSRLDKVEAEVQIDRLITGRLQSLQTYVTQQLIRAA  
SARS-CoV-2 QALNTLVKQLSSNFGAISSVLDNIDLSRLDKVEAEVQIDRLITGRLQSLQTYVTQQLIRAA  
RaTG13 QALNTLVKQLSSNFGAISSVLDNIDLSRLDKVEAEVQIDRLITGRLQSLQTYVTQQLIRAA  
\*\*\*\*\*:\*\*\*\*\*:\*\*\*\*\*:\*\*\*\*\*:\*\*\*\*\*:\*\*\*\*\*

SARS-CoV EIRASANLAATKMSECVLGQSKRVDFCGKGYHLSFPQAAPHGVVFLHVTYVPSQERNFT  
SARS-CoV-2 EIRASANLAATKMSECVLGQSKRVDFCGKGYHLSFPQSAPHGVVFLHVTYVPAQEKNF  
RaTG13 EIRASANLAATKMSECVLGQSKRVDFCGKGYHLSFPQSAPHGVVFLHVTYVPAQEKNF  
\*\*\*\*\*:\*\*\*\*\*:\*\*\*\*\*:\*\*\*\*\*:\*\*\*\*\*:\*\*\*\*\*

SARS-CoV TAPAICHGKAYFPREGVVFVNGTSWFITQRNFFSPQIITTDNTFVSGNCDVVI IINNT  
SARS-CoV-2 TAPAICHGKAHFPREGVVFVSNHTHWFVTQRNFYEPQIITTDNTFVSGNCDVVI IIVNNT  
RaTG13 TAPAICHGKAHFPREGVVFVSNHTHWFVTQRNFYEPQIITTDNTFVSGNCDVVI IIVNNT  
\*\*\*\*\*:\*\*\*:\*\*\*\*\*:\*\*\* \*\*:\*:\*:\*:\*:\*\*\*\*\*:\*\*\*\*\*:\*\*\*\*\*

SARS-CoV VYDPLQPELDSFKEELDKYFKNHTSPDVLGD ISGINASVVNIQKEIDRLNEVAKNLNES  
SARS-CoV-2 VYDPLQPELDSFKEELDKYFKNHTSPDVLGD ISGINASVVNIQKEIDRLNEVAKNLNES  
RaTG13 VYDPLQPELDSFKEELDKYFKNHTSPDVLGD ISGINASVVNIQKEIDRLNEVAKNLNES  
\*\*\*\*\*:\*\*\*\*\*:\*\*\*\*\*:\*\*\*\*\*:\*\*\*\*\*:\*\*\*\*\*

SARS-CoV LIDLQELGKYEQYIKWPWYVWLGFIA GLIAIVMVTILCCMTSCCCLKGACSCGSCCKF  
SARS-CoV-2 LIDLQELGKYEQYIKWPWYIWLGFIA GLIAIVMVTIMLCCMTSCCCLKGCCSCGSCCKF  
RaTG13 LIDLQELGKYEQYIKWPWYIWLGFIA GLIAIIMVTIMLCCMTSCCCLKGCCSCGSCCKF  
\*\*\*\*\*:\*\*\*\*\*:\*\*\*\*\*:\*\*\*\*\*:\*\*\*\*\*:\*\*\*\*\*

SARS-CoV DEDDSEPVKGVKLHYT 1255  
SARS-CoV-2 DEDDSEPVKGVKLHYT 1273  
RaTG13 DEDDSEPVKGVKLHYT 1269  
\*\*\*\*\*:\*\*\*\*\*:\*\*\*\*\*

## M Protein

SARS-CoV -MADNGTITVEELKQLLEQWNLVIGFLFLAWIMLLQFAYSNNRNFLYIIKLVFLWLLWPFV  
SARS-CoV-2 MADNGTITVEELKQLLEQWNLVIGFLFLTWICLLQFAYANRNRFYI IKLIFLWLLWPFV  
RaTG13 -MADNGTITVEELKQLLEQWNLVIGFLFLTWICLLQFAYANRNRFYI IKLIFLWLLWPFV  
\*\*\*\*\*:\*\*\*\*\*:\*\*\*\*\*:\*\*\*\*\*:\*\*\*\*\*:\*\*\*\*\*

SARS-CoV TLACFVLAAVYRINWVTGGIAI AMACIVGLMWLSYFVASFRLFARTRSMWSFNPETNILL  
SARS-CoV-2 TLACFVLAAVYRINWITGGIAI AMACLVGLMWLSYFIASFRLFARTRSMWSFNPETNILL  
RaTG13 TLACFVLAAVYRINWITGGIAI AMACLVGLMWLSYFIASFRLFARTRSMWSFNPETNILL  
\*\*\*\*\*:\*\*\*\*\*:\*\*\*\*\*:\*\*\*\*\*:\*\*\*\*\*:\*\*\*\*\*

SARS-CoV NVPLRGTIVTRPLMESELVIGAVIIRGHLRMAGHSLGRC DIKDLPKETVATSRTLSYYK  
SARS-CoV-2 NVPLHGTILTRP LLESELVIGAVILRGHLRIAGHHLGRC DIKDLPKETVATSRTLSYYK  
RaTG13 NVPLHGTILTRP LLESELVIGAVILRGHLRIAGHHLGRC DIKDLPKETVATSRTLSYYK  
\*\*\*\*:\*\*\*:\*\*\*:\*\*\*\*\*:\*\*\*\*\*:\*\*\* \*\*\*\*\*:\*\*\*\*\*:\*\*\*\*\*

SARS-CoV LGASQRVGTDSGFAAYNR YRIGNYKLNTDHAGSNDNIALLVQ  
SARS-CoV-2 LGASQRVAGDSGFAAYS RYRIGNYKLNTDHSSSDNIALLVQ  
RaTG13 LGASQRVAGDSGFAAYS RYRIGNYKLNTDHSSSDNIALLVQ  
\*\*\*\*\*:\*\*\*\*\*:\*\*\*\*\*:\*\*\*\*\*:\*\*\*\*\*

## E protein

```
SARS-CoV-2 MYSFVSEETGTLIVNSVLLFLAFVVFLLVTLAILTALRLCAYCCNIVNVSLVKPSFYVYS
RaTG13 MYSFVSEETGTLIVNSVLLFLAFVVFLLVTLAILTALRLCAYCCNIVNVSLVKPSFYVYS
SARS-CoV MYSFVSEETGTLIVNSVLLFLAFVVFLLVTLAILTALRLCAYCCNIVNVSLVKPTVYVYS
*****:*****

SARS-CoV-2 RVKNLNSSR-VPDLLV
RaTG13 RVKNLNSSR-VPDLLV
SARS-CoV RVKNLNSESEGVDPDLLV
*****.*****
```

## N Protein

```
SARS-CoV-2 MSDNGPQ-NQRNAPRITFGGPSDSTGSNQNNGERSGARSKQRRPQGLPNNTASWFTALTQH
RaTG13 MSDNGPQ-NQRNAPRITFGGPSDSTGSNQNNGERSGARSKQRRPQGLPNNTASWFTALTQH
SARS-CoV MSDNGPQSNQRSAPRITFGGPTDSTDNNQNGGRNGARPKQRRPQGLPNNTASWFTALTQH
***** **.******:***.* **.* **.* *****

SARS-CoV-2 GKEDLKFRPQGQVFINTEINSSPDDQIGYRRATRRIRGGDGKMKDLSRWYFYLLGTGPEA
RaTG13 GKEDLKFRPQGQVFINTEINSSPDDQIGYRRATRRIRGGDGKMKDLSRWYFYLLGTGPEA
SARS-CoV GKELRFRPQGQVFINTEINSGPDDQIGYRRATRRVIRGGDGKMKELSPRWYFYLLGTGPEA
**.*:*****.*****:*****:*****:*****

SARS-CoV-2 GLPYGANKDGIWVATEGALNTPKDHIGTRNPANNAIIVLQLPQGTTLPKGFYAEGSRGG
RaTG13 GLPYGANKDGIWVATEGALNTPKDHIGTRNPANNAIIVLQLPQGTTLPKGFYAEGSRGG
SARS-CoV SLPYGANKGIVVWVATEGALNTPKDHIGTRNPANNAATVQLPQGTTLPKGFYAEGSRGG
.*****:*.***** **.* *****

SARS-CoV-2 SQASSRSSRSRNSSRNSTPGSSRGTS PARMAGNGGDAALALLLDRLNQLESKMSGKGQ
RaTG13 SQASSRSSRSRNSSRNSTPGSSRGTS PARMAGNGS DAALALLLDRLNQLESKMSGKGQ
SARS-CoV SQASSRSSRSRGNRNSTPGSSRGNS PARMASGGGTALALLLDRLNQLESKMSGKGQ
*****.*****.*****.***:*****:*****

SARS-CoV-2 QQQGQTVTKKSAEASKKPRQKRTATKAYNVTQAFGRRGPEQTQGNFGDQELIRQGTDYK
RaTG13 QQQSQTVTKKSAEASKKPRQKRTATKQYNVTQAFGRRGPEQTQGNFGDQELIRQGTDYK
SARS-CoV QQQGQTVTKKSAEASKKPRQKRTATKQYNVTQAFGRRGPEQTQGNFGDQDLIRQGTDYK
**.* *****

SARS-CoV-2 HWPQIAQFAPSASAFFGMSRIGMEVTPSGTWLTYTGAIKLDDKDPNFKDQVILLNKHIDA
RaTG13 HWPQIAQFAPSASAFFGMSRIGMEVTPSGTWLTYTGAIKLDDKDPNFKDQVILLNKHIDA
SARS-CoV HWPQIAQFAPSASAFFGMSRIGMEVTPSGTWLTYHGAIKLDDKDPQFKDNVILLNKHIDA
*****:*****:*****

SARS-CoV-2 YKTFPPTPEPKDKKKKADETTQALPQRQKQQTVTLPAADLDDFSKQLQQSMSSADSTQA
RaTG13 YKTFPPTPEPKDKKKKADETTQALPQRQKQQTVTLPAADLDDFSKQLQQSMSSADSTQA
SARS-CoV YKTFPPTPEPKDKKKKTDEAQPLPQRQKQPTVTLPAADMDDFSRQLQNSMSGASADST
*****:***.* ***** *****:*****:*****:***.*:

SARS-CoV-2 --
RaTG13 --
SARS-CoV QA
```

**Data S1. Homology of the predicted epitopes of S, M, E, N proteins among SARS-CoV-2, SARS-CoV and bat coronavirus RaTG13. Related to Figure 1.**
